# Supplementary material for: Ring-Opening Polymerization of rac-β-Butyrolactone Promoted by New Tetradentate Thioether-Amide Ligand-Type Zinc Complexes
Source: MDPI journal article supplement (doi:10.3390/polym15224366), 2023-11-09
Supplement: s1 [file s1]

# Supplementary Information

## **Ring-Opening Polymerization of *rac*- $\beta$ -Butyrolactone Promoted by New Tetradentate Thioether-Amide Ligand-Type Zinc Complexes**

*Salvatore Impemba*<sup>1</sup>, *Gabriele Manca*<sup>2</sup>, *Irene Tozio*<sup>3</sup> and *Stefano Milione*<sup>3,\*</sup>

<sup>1</sup> *Center for Colloid and Surface Science, Department of Chemistry, University of Florence,  
Via della Lastruccia, 3, 50019 Sesto Fiorentino, Firenze, Italy*

<sup>2</sup> *CNR-ICCOM, Consiglio Nazionale delle Ricerche, Via Madonna del Piano, 10, 50019 Sesto  
Fiorentino, Firenze, Italy*

<sup>3</sup> *Department of Chemistry, University of Salerno, Via Giovanni Paolo II, 84084 Fisciano, Salerno,  
Italy*

|                                                                                                                                                     |                   |
|-----------------------------------------------------------------------------------------------------------------------------------------------------|-------------------|
| <b>Experimental section</b>                                                                                                                         | <i>pag.</i><br>S3 |
| <b>Figure S1:</b> $^1\text{H}$ NMR of [NSSN-iPr].                                                                                                   | S5                |
| <b>Figure S2:</b> $^{13}\text{C}$ NMR of [NSSN-iPr].                                                                                                | S5                |
| <b>Figure S3:</b> $^1\text{H}$ NMR of [NSSN-iPr]Zn ( <b>1</b> ).                                                                                    | S6                |
| <b>Figure S4:</b> $^{13}\text{C}$ NMR of [NSSN-iPr]Zn ( <b>1</b> ).                                                                                 | S6                |
| <b>Figure S5:</b> Dept 135 NMR of [NSSN-iPr]Zn ( <b>1</b> ).                                                                                        | S7                |
| <b>Figure S6:</b> HSQC of [NSSN-iPr]Zn ( <b>1</b> ).                                                                                                | S7                |
| <b>Figure S7:</b> Variable temperature $^1\text{H}$ NMR of [NSSN-iPr]Zn ( <b>1</b> ).                                                               | S8                |
| <b>Figure S8:</b> $^1\text{H}$ NMR of [NSSN-Cy].                                                                                                    | S9                |
| <b>Figure S9:</b> $^{13}\text{C}$ NMR of [NSSN-Cy].                                                                                                 | S9                |
| <b>Figure S10:</b> $^1\text{H}$ NMR of [NSSN-Cy]Zn ( <b>2</b> ).                                                                                    | S10               |
| <b>Figure S11:</b> $^{13}\text{C}$ NMR of [NSSN-Cy]Zn ( <b>2</b> ).                                                                                 | S10               |
| <b>Figure S12:</b> Comparison between $^{13}\text{C}$ and Dept 135 NMR of [NSSN-Cy]Zn ( <b>2</b> ).                                                 | S11               |
| <b>Figure S13:</b> HSQC and COSY of the aromatic zone of [NSSN-Cy]Zn ( <b>2</b> ).                                                                  | S11               |
| <b>Figure S14:</b> $^1\text{H}$ NMR of [NSSN-Mes].                                                                                                  | S12               |
| <b>Figure S15:</b> $^{13}\text{C}$ NMR of [NSSN-Mes].                                                                                               | S12               |
| <b>Figure S16:</b> $^1\text{H}$ NMR of [NSSN-Mes]Zn ( <b>3</b> ).                                                                                   | S13               |
| <b>Figure S17:</b> $^{13}\text{C}$ NMR of [NSSN-Mes]Zn ( <b>3</b> ).                                                                                | S14               |
| <b>Figure S18:</b> Comparison between $^{13}\text{C}$ and Dept 135 NMR of [NSSN-Mes]Zn ( <b>3</b> ).                                                | S15               |
| <b>Figure S19:</b> Pseudo-first-order kinetic plots for ROP of LA by <b>1</b> .                                                                     | S16               |
| <b>Figure S20:</b> $^1\text{H}$ NMR of PBL obtained using [NSSN-iPr]Zn ( <b>1</b> ) as catalyst.                                                    | S17               |
| <b>Figure S21:</b> $^{13}\text{C}$ NMR of PBL obtained using [NSSN-iPr]Zn ( <b>1</b> ) as catalyst.                                                 | S17               |
| <b>Figure S22:</b> $^1\text{H}$ NMR of oligomers of PBL obtained using [NSSN-iPr]Zn ( <b>1</b> ) as catalyst.                                       | S18               |
| <b>Figure S23:</b> $^{13}\text{C}$ NMR of oligomers of PBL obtained using [NSSN-iPr]Zn ( <b>1</b> ) as catalyst.                                    | S18               |
| <b>Figure S24:</b> $^1\text{H}$ NMR of oligomers of PLA obtained using [NSSN-iPr]Zn ( <b>1</b> ) as catalyst.                                       | S19               |
| <b>Figure S25:</b> $^{13}\text{C}$ NMR of oligomers of PLA obtained using [NSSN-iPr]Zn ( <b>1</b> ) as catalyst.                                    | S19               |
| <b>Figure S26:</b> SEC of PBL obtained using [NSSN-iPr]Zn ( <b>1</b> ) as catalyst.                                                                 | S20               |
| <b>Figure S27:</b> Minimum-energy structure of complex <b>1</b> .                                                                                   | S21               |
| <b>Figure S28:</b> Minimum-energy structure of complex <b>2</b> .                                                                                   | S21               |
| <b>Figure S29:</b> Minimum-energy structure of complex <b>3</b> .                                                                                   | S22               |
| <b>Figure S30:</b> Minimum-energy structure of adduct <b>6</b> .                                                                                    | S22               |
| <b>Figure S31:</b> Minimum-energy structure of intermediate <b>7</b> .                                                                              | S23               |
| <b>Figure S32:</b> Relative free energy pathway for the formation of <b>8<sub>L</sub></b> starting from <b>1</b> together with isopropanol and LLA. | S23               |
| Cartesian coordinates and free energies of all the structures optimized in the computational analysis.                                              | S24               |

## Experimental section

**Materials and methods.** All preparations and subsequent manipulation of air- and/or water-sensitive compounds were carried out under a dry nitrogen atmosphere using a Braun Labmaster drybox or standard Schlenk line techniques. Glassware and vials used in the polymerization were dried in an oven at 120°C overnight and exposed three times to vacuum-nitrogen cycles. All solvents and reagent were dried and purified before use. Toluene (Sigma-Aldrich, 99.5%) and hexane (Sigma-Aldrich, 99%) were heated to reflux for 48 h over sodium or sodium ketyls and distilled before use for moisture- and oxygen-sensitive reactions. All other solvents were used as received (TCI or Sigma-Aldrich) or distilled under reduced pressure over calcium hydride. Ligands used for the synthesis of complexes were dried in vacuum with P<sub>2</sub>O<sub>5</sub>. Rac- $\beta$ -butyrolactone (BBL),  $\epsilon$ -caprolactone ( $\epsilon$ -CL) and isopropyl alcohol (iPrOH) were dried over CaH<sub>2</sub> one night and freshly distilled under reduced pressure. L-lactide was purified by recrystallization from toluene twice and subsequently dried over P<sub>2</sub>O<sub>5</sub> under dynamic vacuum and finally stored in the glove box. Deuterated solvents were purchased from Sigma-Aldrich dried over activated 4Å molecular sieves prior to use.

**Instruments and Measurements.** The NMR spectra were collected by using Bruker Avance spectrometers (600, 400, 300 MHz for <sup>1</sup>H). Chemical shifts ( $\delta$ ) are listed as parts per million and coupling constants ( $J$ ) in Hertz. <sup>1</sup>H NMR spectra are referenced using the residual solvent peak at  $\delta$  7.16 for C<sub>6</sub>H<sub>6</sub>,  $\delta$  7.27 for CDCl<sub>3</sub>,  $\delta$  5.32 for CD<sub>2</sub>Cl<sub>2</sub> and  $\delta$  6.00 for C<sub>2</sub>D<sub>2</sub>Cl<sub>4</sub>. <sup>13</sup>C NMR spectra are referenced using the residual solvent peak at  $\delta$  128.39 for C<sub>6</sub>H<sub>6</sub>,  $\delta$  77.23 for CDCl<sub>3</sub>,  $\delta$  53.84 for CD<sub>2</sub>Cl<sub>2</sub> and  $\delta$  73.78 for C<sub>2</sub>D<sub>2</sub>Cl<sub>4</sub>.

### Synthesis of the NSSN ligands.

*Synthesis of 1,2-Bis(aminophenylthio)ethane [NSSN].* 1,2-Dibromoethane (7.3 g, 39 mmol) was added dropwise to a solution of 2-aminothiophenol (9.8 g, 78 mmol) and sodium hydroxide (3.1 g, 78 mmol) in ethanol (100 mL). The reaction mixture was refluxed for 1 h. Upon completion of the reaction, the reaction mixture was cooled to room temperature and the solvent was removed in vacuo. Water (50 mL) was added, and the reaction mixture was extracted with diethyl ether (4x 50 mL). The organic layer was dried with anhydrous Na<sub>2</sub>SO<sub>4</sub>, filtered and evaporated to dryness in vacuo to get a yellow solid product (10.7 g, yield = 99 %). <sup>1</sup>H NMR (400.13 MHz, CDCl<sub>3</sub>, 25 °C)  $\delta$  ppm. 6.64-7.31 (m, 8H, ArH), 4.35 (s, 4H, 2x NH<sub>2</sub>), 2.86 (s, 4H, 2x S-CH<sub>2</sub>). <sup>13</sup>C NMR (100.62 MHz, CDCl<sub>3</sub>, 25 °C)  $\delta$  ppm. 34.61, 115.16, 116.86, 118.71, 130.15, 136.30, 148.68.

*Synthesis of 2,2'-(ethane-1,2-diylbis(sulfanediyl))bis(N-isopropylaniline) [NSSN-iPr].* [NSSN] (5.79 g, 21 mmol), zinc (13.73 g, 0.21 mol), acetic acid (60 mL), and acetone (13.46 g, 0.21 mol) were added to a 250 mL round-bottom one necked flask equipped with a condenser and a Teflon-sealed stirbar. The mixture was heated to room temperature for 48 h. After it was cooled to room temperature, the mixture was quenched with a 30% NH<sub>3</sub> aqueous solution (150 mL) and diethyl ether (200 mL). The organic layer was dried with anhydrous MgSO<sub>4</sub>, and a whitish solid product was obtained upon removal of the solvent (6.7 g, 88%). <sup>1</sup>H NMR (400.13 MHz, CD<sub>2</sub>Cl<sub>2</sub>, 25 °C)  $\delta$  ppm. 6.54-7.33 (m, 8H, ArH), 4.94 (s, 2H, 2x NH), 3.63-3.67 (q, 2H, 2x CH), 2.77 (s, 4H, 2x S-CH<sub>2</sub>), 1.23

(d,  $J = 6.38$  Hz, 12H, 4x CH<sub>3</sub>). <sup>13</sup>C NMR (100.62 MHz, CD<sub>2</sub>Cl<sub>2</sub>, 25 °C)  $\delta$  ppm. 22.57, 34.51, 43.91, 110.56, 115.93, 115.97, 130.22, 136.52, 148.65.

*Synthesis of 2,2'-(Ethane-1,2-diylbis(sulfanediyl))bis(N-cyclohexylaniline) [NSSN-Cy].* [NSSN] (6.67 g, 24 mmol), zinc (15.8 g, 0.24 mol), acetic acid (100 mL), and cyclohexanone (9.48 g, 48 mmol) were added to a 250 mL round bottom one-necked flask equipped with a condenser and a Teflon sealed stirbar. The mixture was heated to 65 °C for 48 h. After it was cooled to room temperature, the mixture was quenched with a 30% NH<sub>3</sub> aqueous solution (200 mL) and diethyl ether (300 mL). The organic layer was dried with anhydrous Na<sub>2</sub>SO<sub>4</sub>, and a whitish solid product was obtained upon removal of the solvent (10.3 g, 97%). <sup>1</sup>H NMR (400.13 MHz, CDCl<sub>3</sub>, 25 °C)  $\delta$  ppm. 6.52-7.35 (m, 8H, ArH), 5.01 (s, 2H, 2x NH), 3.27-3.30 (m, 2H, 2x CH), 2.77 (s, 4H, 2x S-CH<sub>2</sub>), 1.21-2.02 (m, 20H, cyclohexyl). <sup>13</sup>C NMR (100.62 MHz, CDCl<sub>3</sub>, 25 °C)  $\delta$  ppm. 25.08, 26.10, 33.35, 34.83, 51.48, 110.75, 110.76, 116.18, 130.50, 136.96, 148.72.

*2,2'-(Ethane-1,2-diylbis(sulfanediyl))bis(N-2,4,6-trimethylaniline), [NSSN-Mes].* A Schlenk flask was charged with [NSSN] (0.6 g, 2.2 mmol), mesityl bromide (0.8 g, 4.0 mmol), tris(dibenzylideneacetone)dipalladium(0) (0.078 g, 0.085 mmol), rac-2,2'-bis(diphenylphosphino)-1,1'-binaphthyl (0.13 g, 0.21 mmol), sodium tert-butoxide (0.63 g, 6.56 mmol), and toluene (15 mL). The reaction mixture was stirred and heated to 110 °C under a stream of N<sub>2</sub> for 72 h. After it was cooled to room temperature, the mixture was quenched with a saturated NH<sub>4</sub>Cl aqueous solution and extracted with methylene chloride. The organic layer was dried with anhydrous MgSO<sub>4</sub> and concentrated to dryness under reduced pressure to afford a brown oil. This product was purified via flash column chromatography (SiO<sub>2</sub>, 230–400 mesh, 4:1 n-hexane/CH<sub>2</sub>Cl<sub>2</sub> as the eluent) to give a white solid (0.5 g, 45%). <sup>1</sup>H NMR (400.13 MHz, CD<sub>2</sub>Cl<sub>2</sub>, 25 °C)  $\delta$  ppm. 6.03-7.39 (m, 12H, ArH), 6.41 (s, 4H, 2x NH), 3.01 (s, 4H, 2x S-CH<sub>2</sub>), 2.29 (s, 6H, *p*-CH<sub>3</sub>), 2.06 (s, 12H, *o*-CH<sub>3</sub>). <sup>13</sup>C NMR (100.62 MHz, CD<sub>2</sub>Cl<sub>2</sub>, 25 °C)  $\delta$  ppm. 18.31, 21.06, 34.79, 111.35, 116.23, 117.67, 129.50, 130.61, 135.53, 136.25, 136.62, 136.79, 148.29.

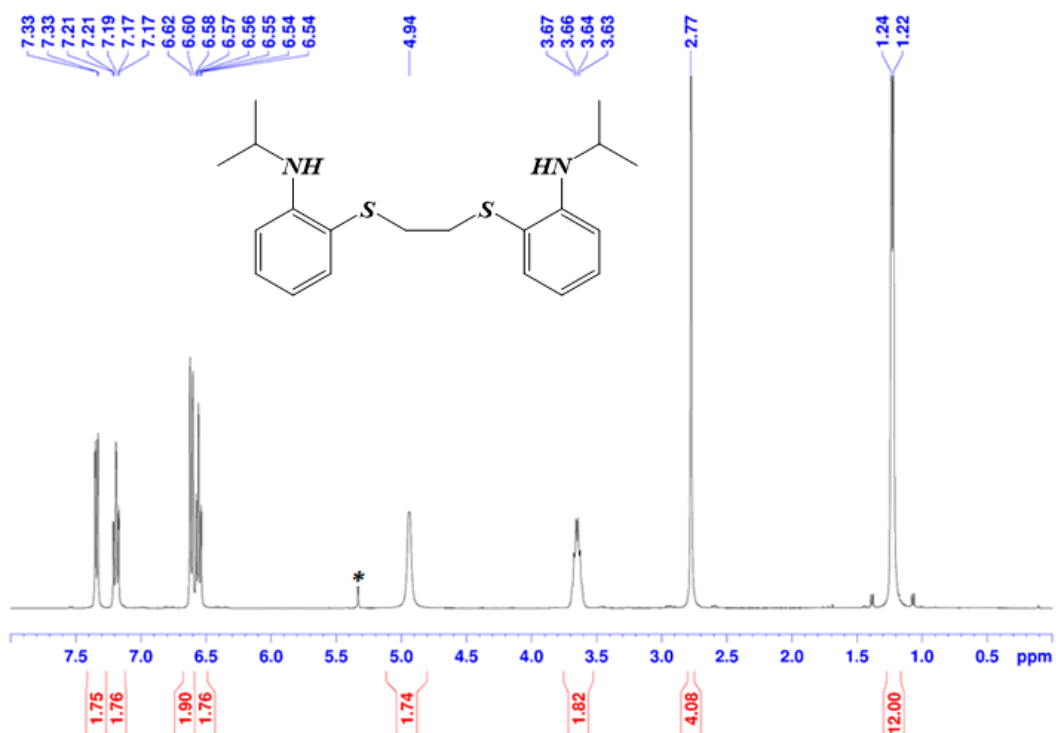

**Figure S1:** <sup>1</sup>H NMR of [NSSN-iPr] (400.13 MHz, \*CD<sub>2</sub>Cl<sub>2</sub>, 25 °C).

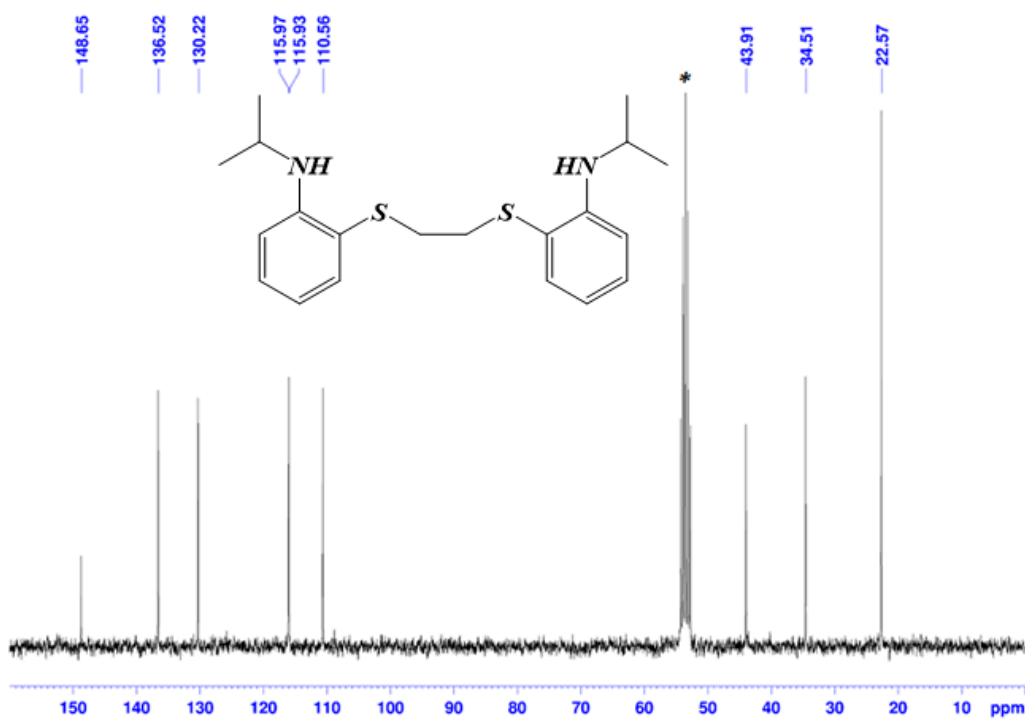

**Figure S2:** <sup>13</sup>C NMR of [NSSN-iPr] (100.62 MHz, \*CD<sub>2</sub>Cl<sub>2</sub>, 25 °C).

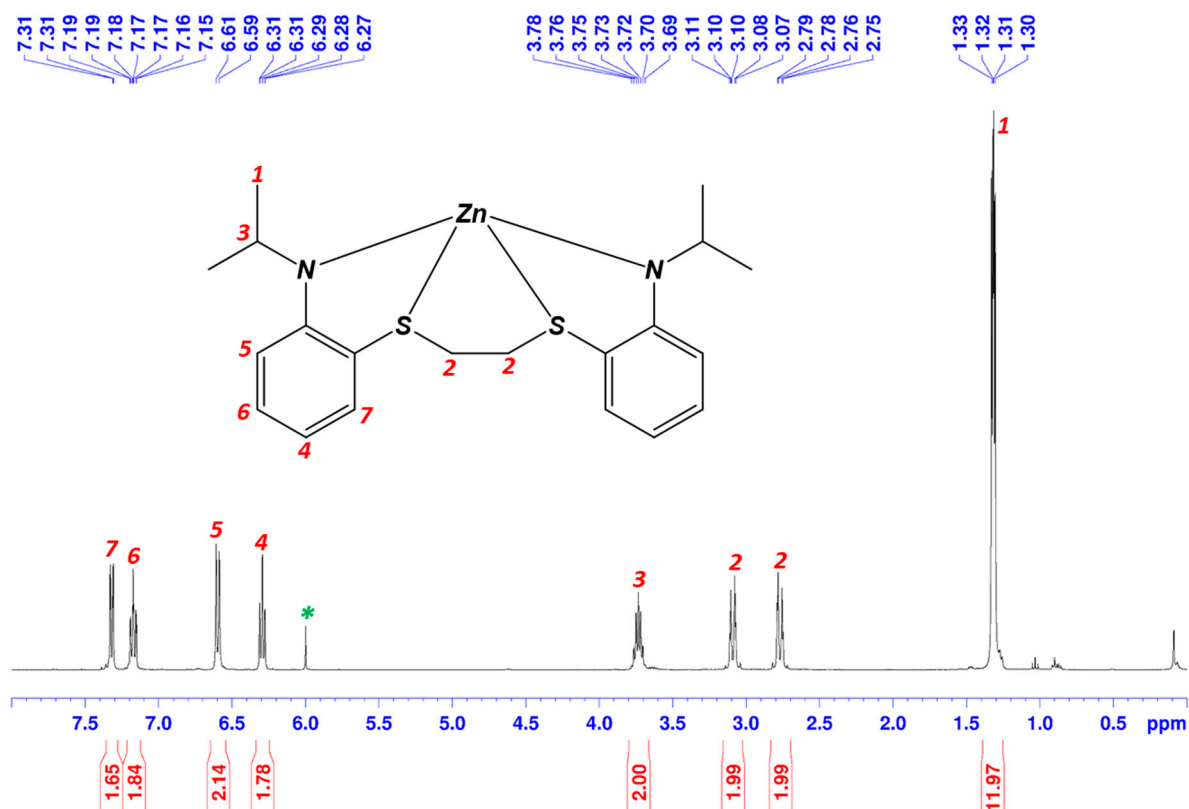

**Figure S3:** <sup>1</sup>H NMR of [NSSN-iPr]Zn (1) (400.13 MHz, <sup>\*</sup>C<sub>2</sub>D<sub>2</sub>Cl<sub>4</sub>, 25 °C).

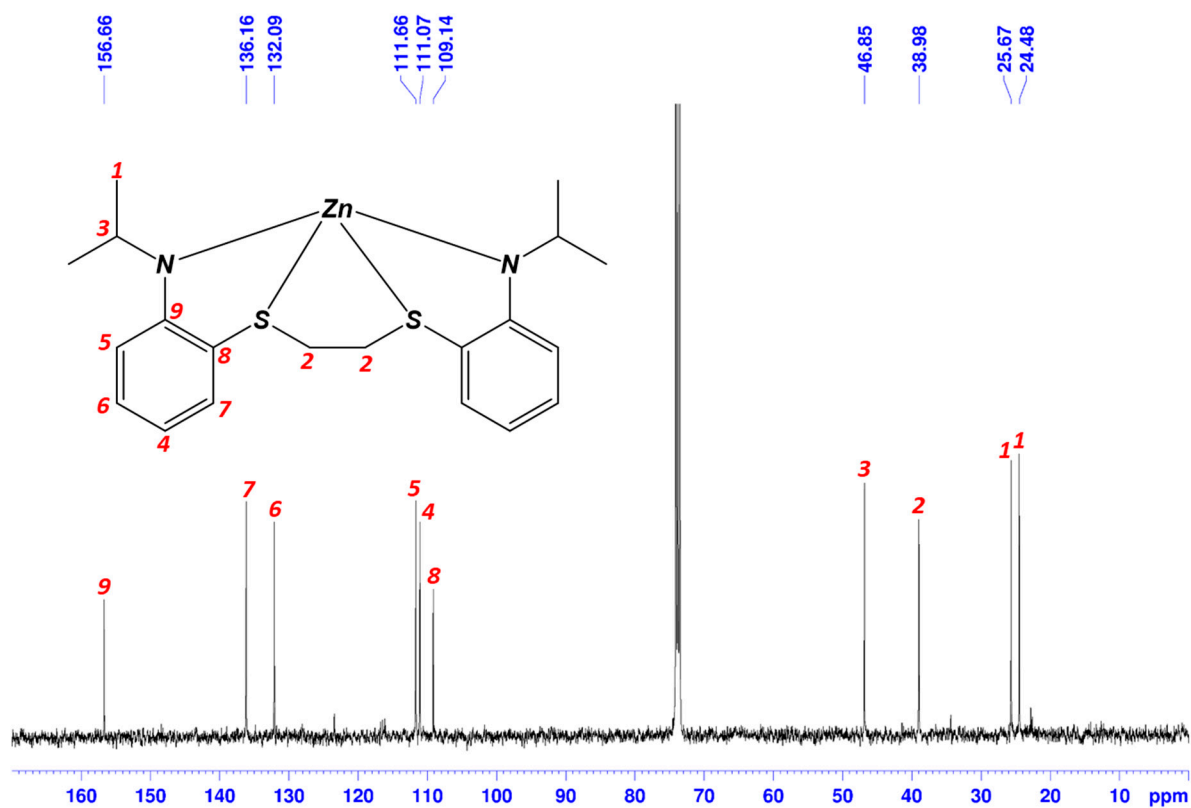

**Figure S4:** <sup>13</sup>C NMR of [NSSN-iPr]Zn (1) (100.62 MHz, <sup>\*</sup>C<sub>2</sub>D<sub>2</sub>Cl<sub>4</sub>, 25 °C).

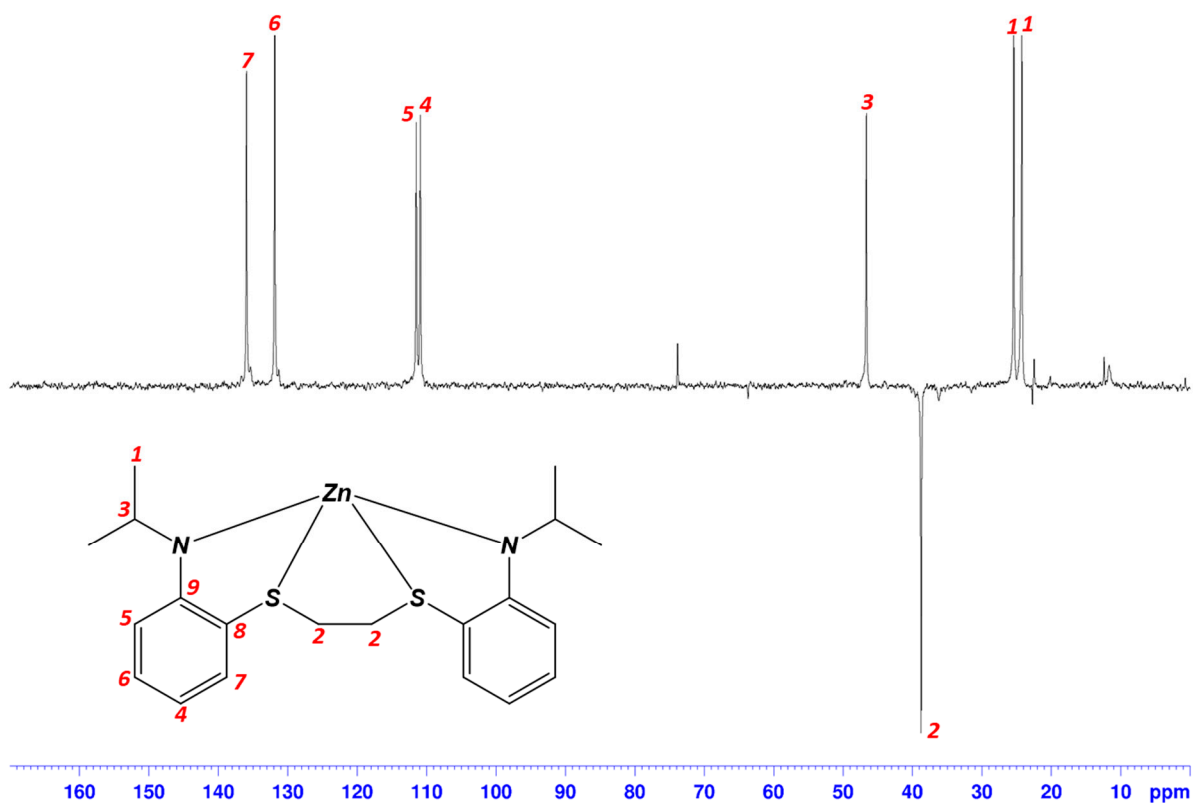

**Figure S5:** Dept 135 NMR of [NSSN-iPr]Zn (**1**) (100.62 MHz,  $\text{CD}_2\text{Cl}_2$ , 25 °C).

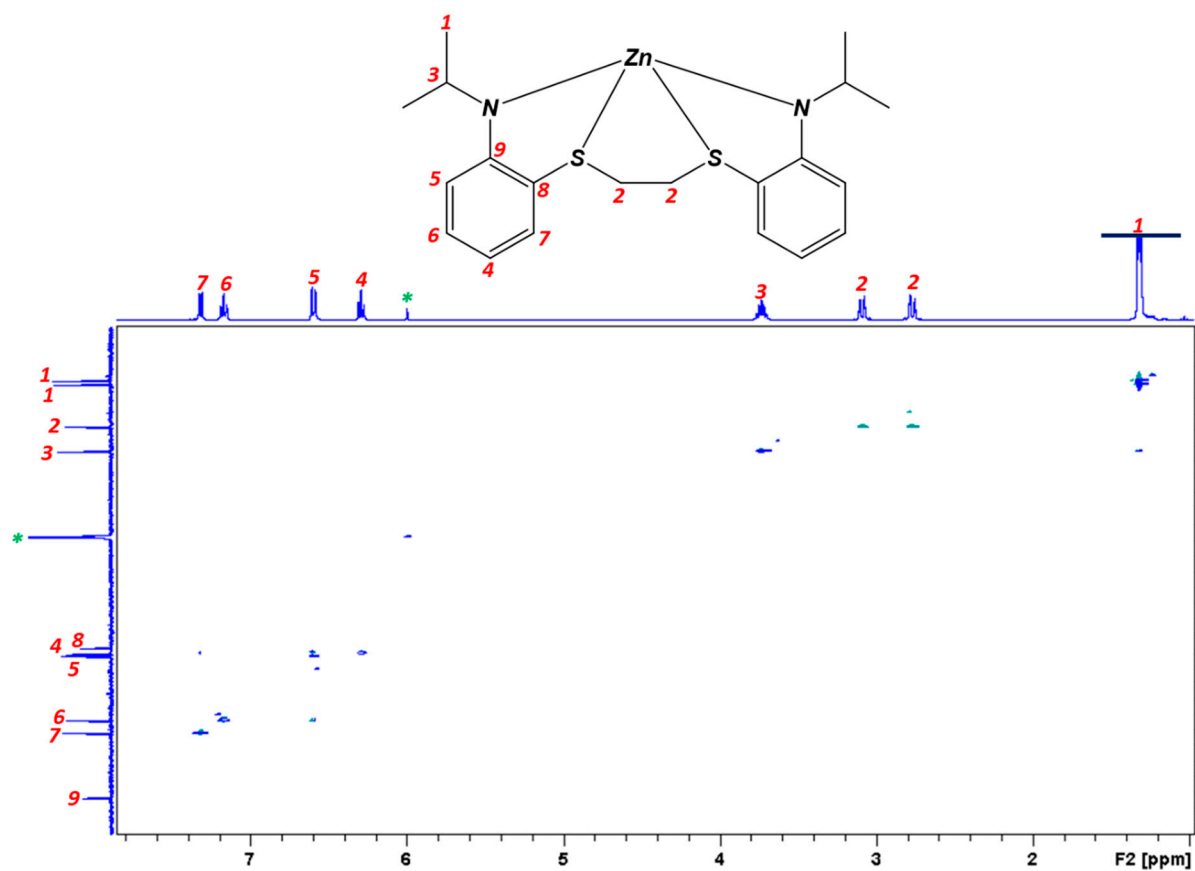

**Figure S6:** HSQC of [NSSN-iPr]Zn (**1**) ( $\text{CD}_2\text{Cl}_2$ , 25 °C).

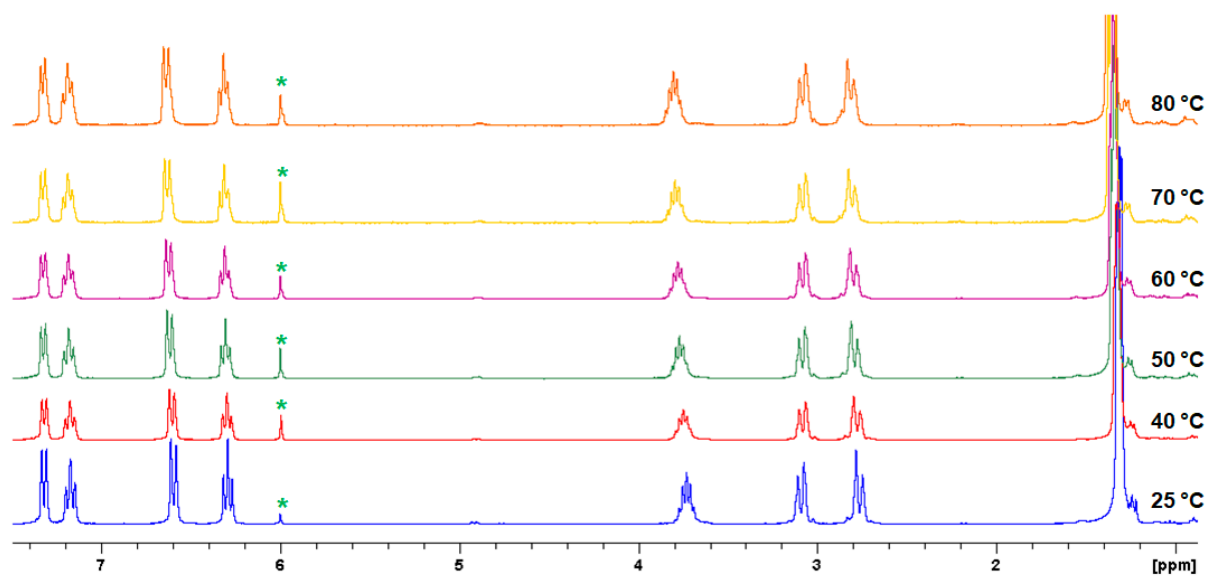

**Figure S7:** Variable temperature  $^1\text{H}$  NMR of  $[\text{NSSN-iPr}]\text{Zn}$  (**1**) ( $^*400.13$  MHz,  $^*\text{C}_2\text{D}_2\text{Cl}_4$ ).



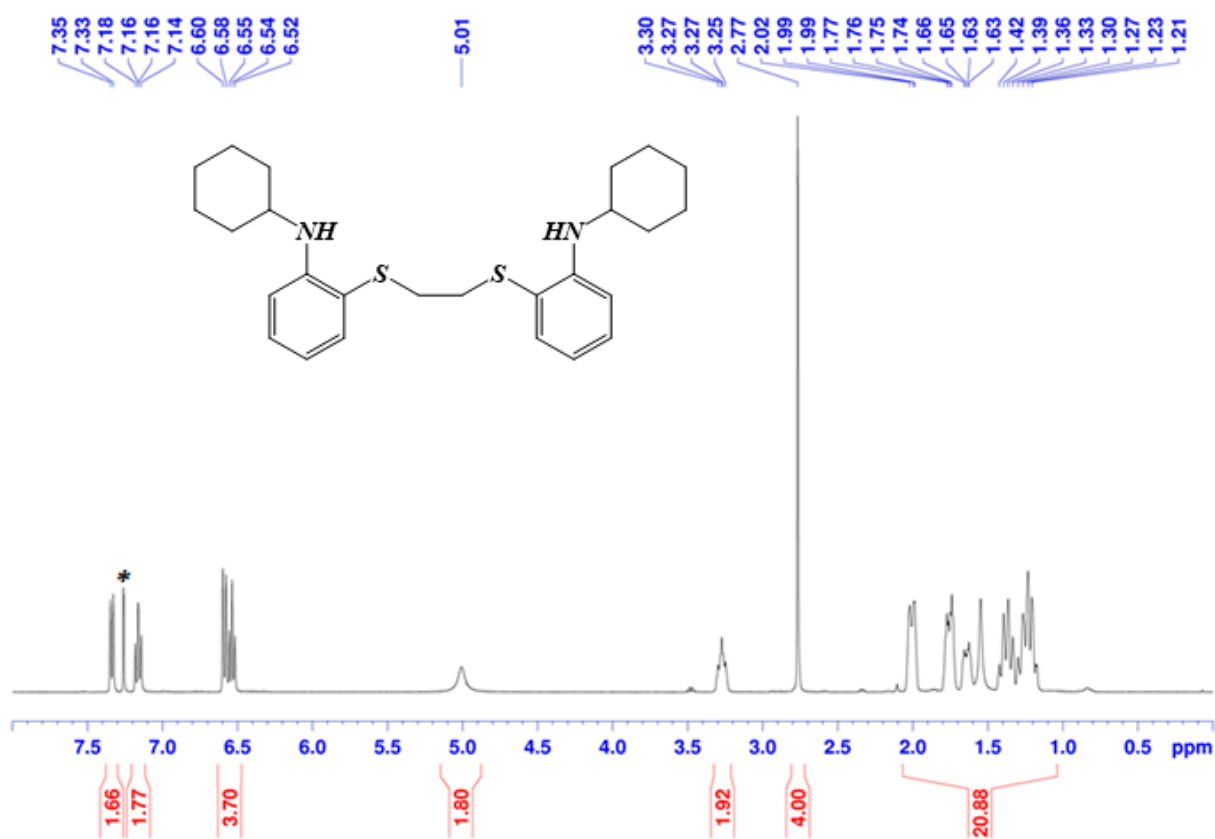

**Figure S8:** <sup>1</sup>H NMR of [NSSN-Cy] (400.13 MHz, \*CDCl<sub>3</sub>, 25 °C).

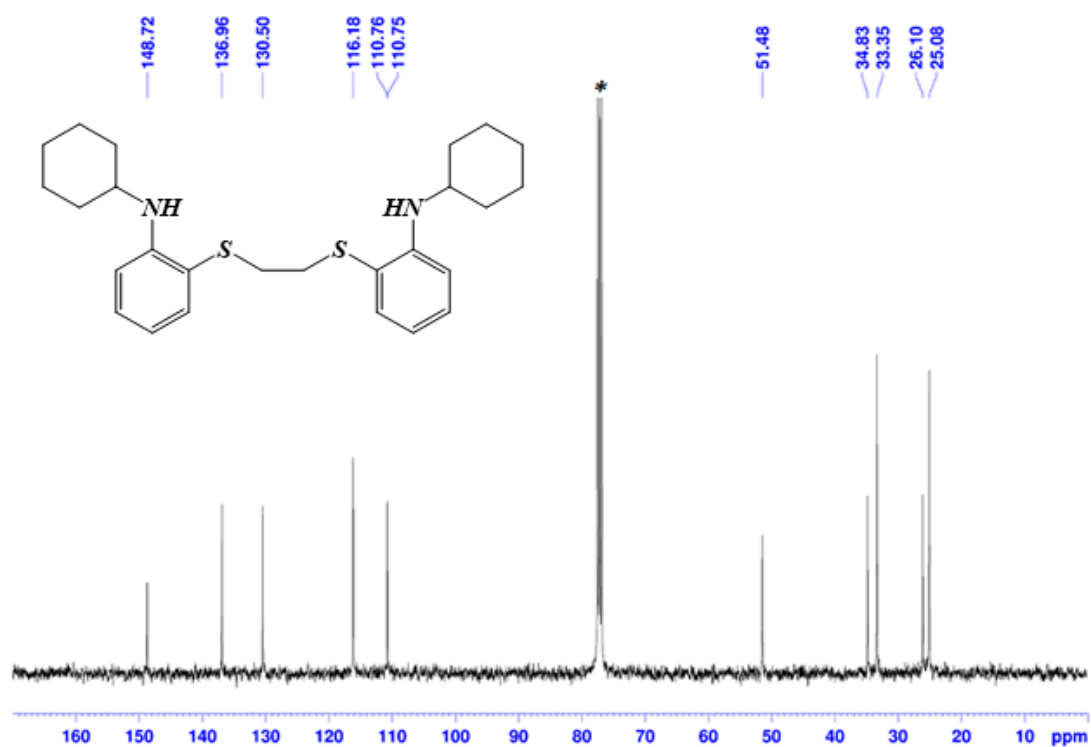

**Figure S9:** <sup>13</sup>C NMR of [NSSN-Cy] (100.62 MHz, \*CDCl<sub>3</sub>, 25 °C).

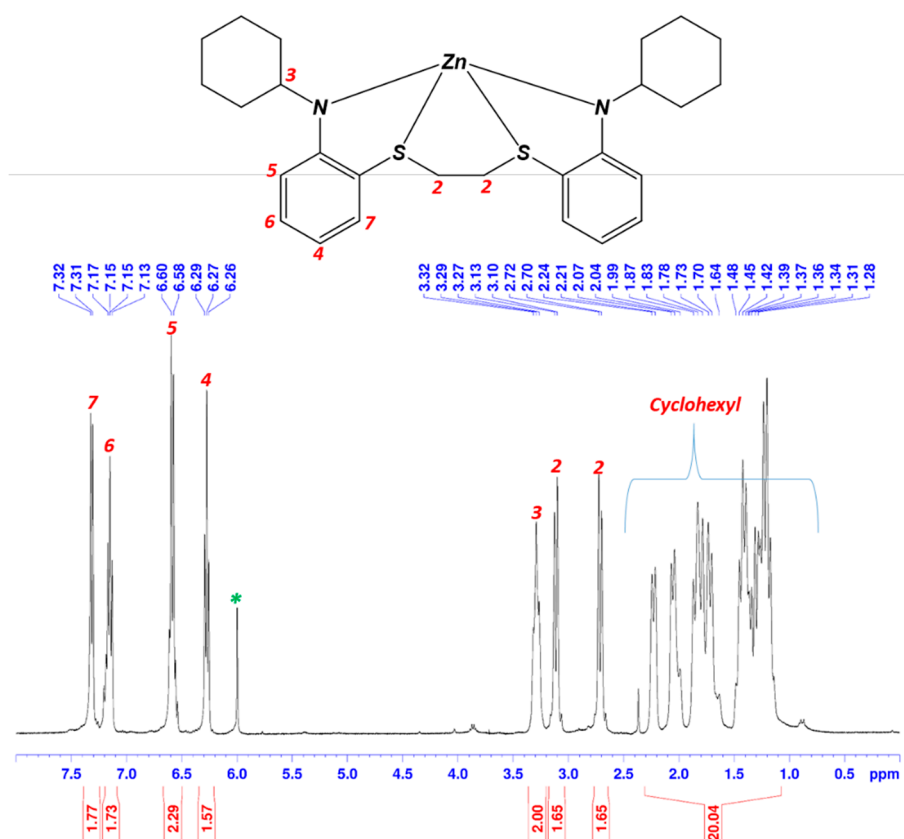

**Figure S10:**  $^1\text{H}$  NMR of [NSSN-Cy]Zn (**2**) (400.13 MHz,  $^*\text{C}_2\text{D}_2\text{Cl}_4$ , 25  $^\circ\text{C}$ ).

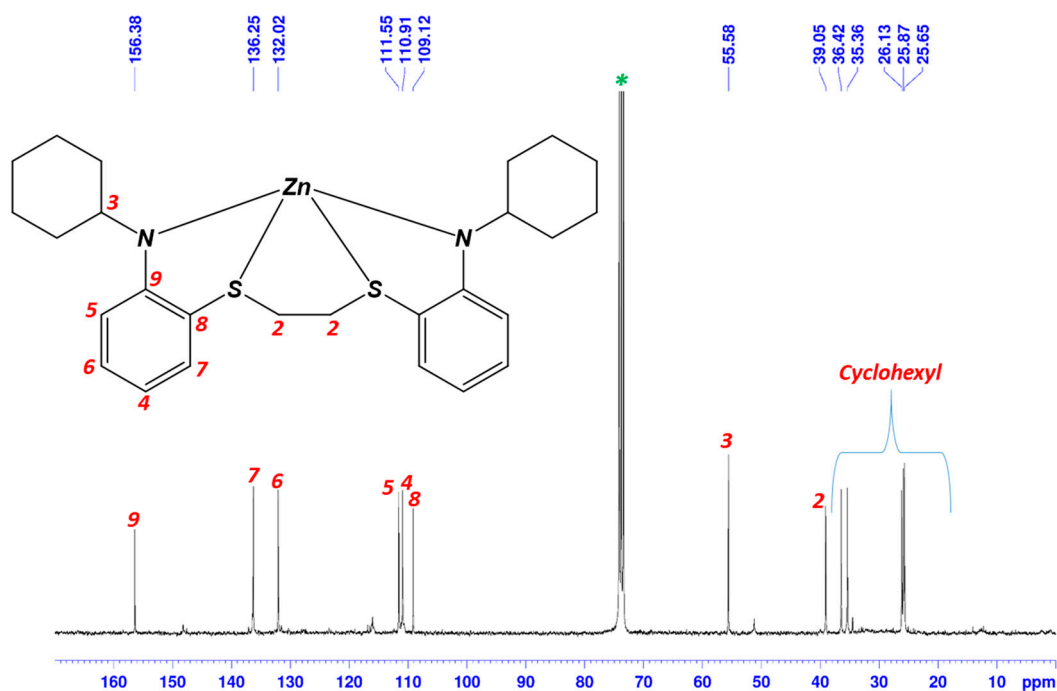

**Figure S11:**  $^{13}\text{C}$  NMR of [NSSN-Cy]Zn (**2**) (100.62 MHz,  $^*\text{C}_2\text{D}_2\text{Cl}_4$ , 25  $^\circ\text{C}$ ).

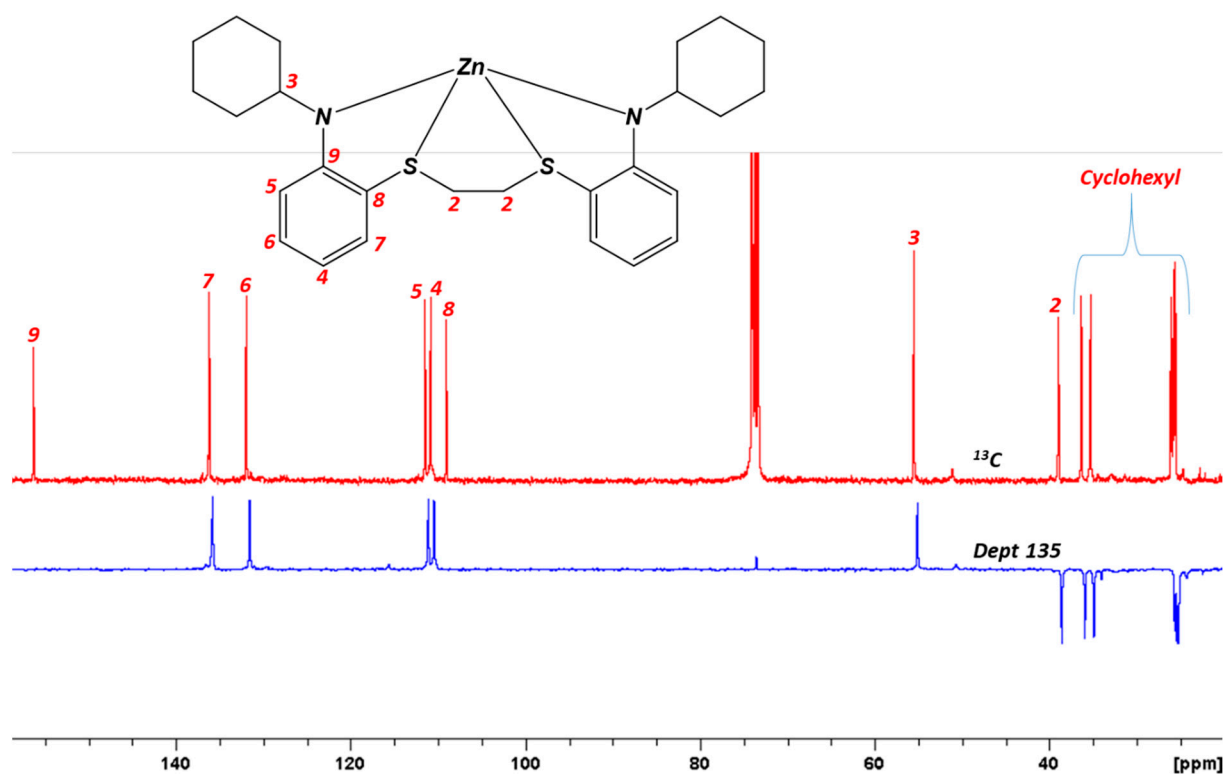

**Figure S12:** Comparison between  $^{13}\text{C}$  and Dept 135 NMR of [NSSN-Cy]Zn (2) (100.62 MHz,  $^*\text{C}_2\text{D}_2\text{Cl}_4$ , 25  $^\circ\text{C}$ ).

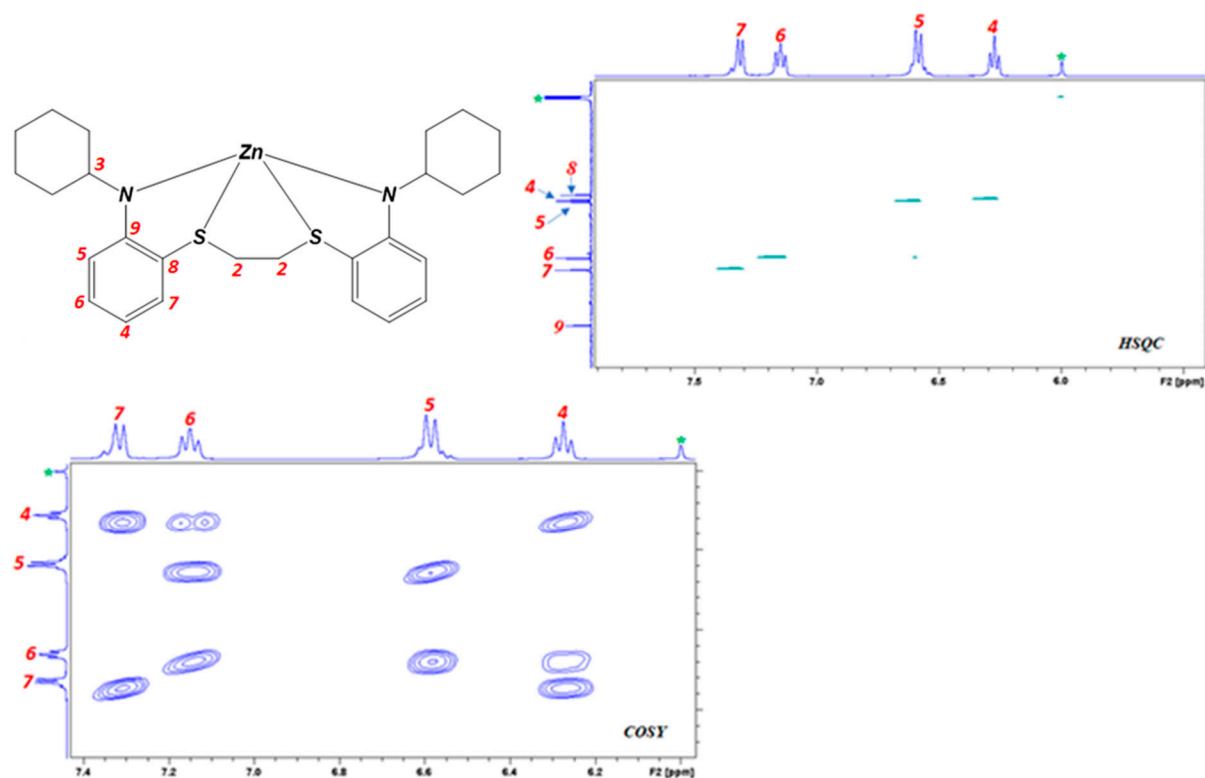

**Figure S13:** HSQC and COSY of the aromatic zone of [NSSN-Cy]Zn (2) ( $^*\text{C}_2\text{D}_2\text{Cl}_4$ , 25  $^\circ\text{C}$ ).

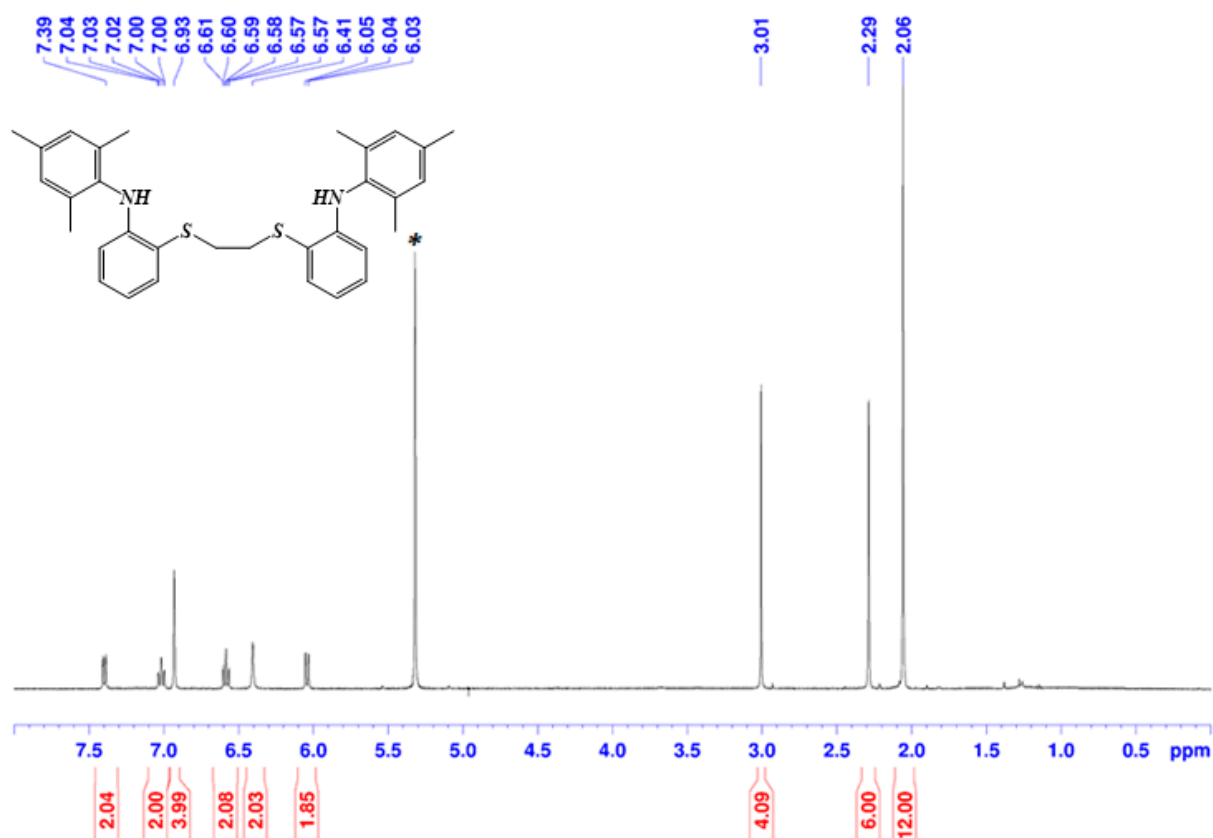

**Figure S14:** <sup>1</sup>H NMR of [NSSN-Mes] (400.13 MHz, \*CD<sub>2</sub>Cl<sub>2</sub>, 25 °C).

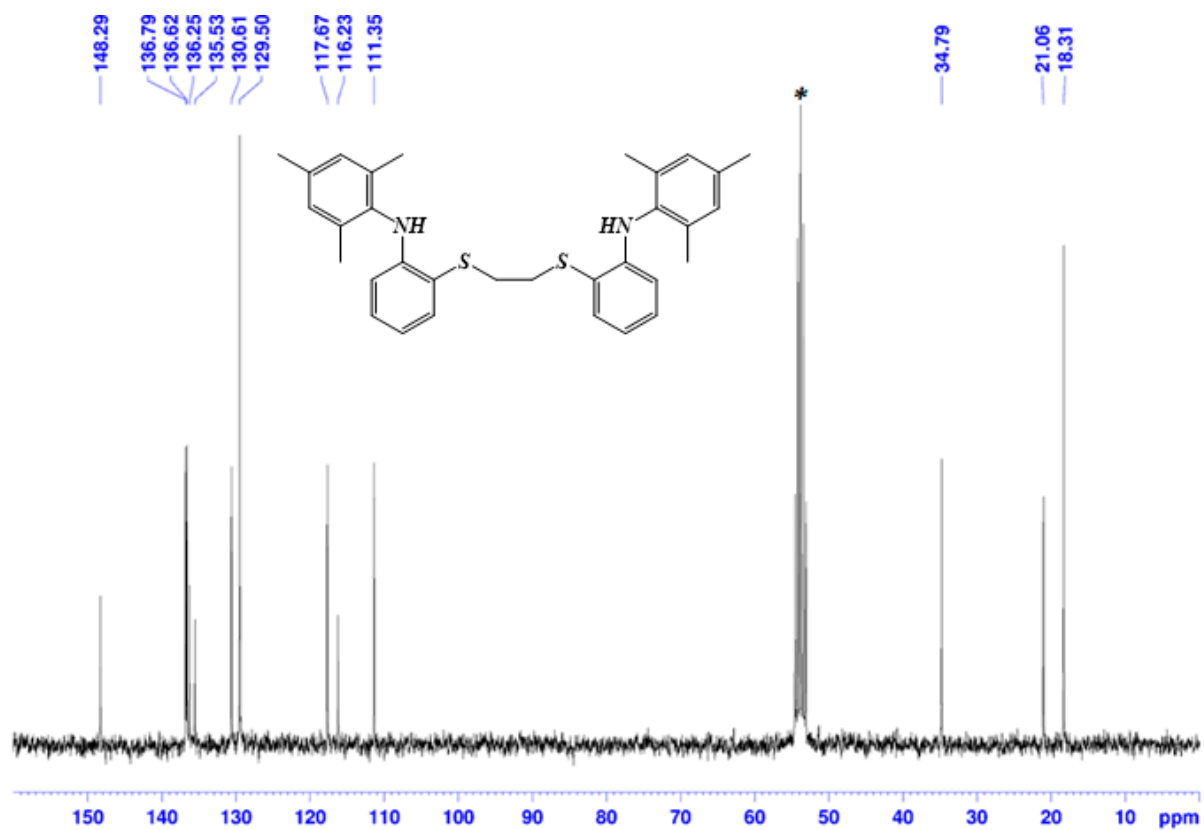

**Figure S15:** <sup>13</sup>C NMR of [NSSN-Mes] (100.62 MHz, \*CD<sub>2</sub>Cl<sub>2</sub>, 25 °C).

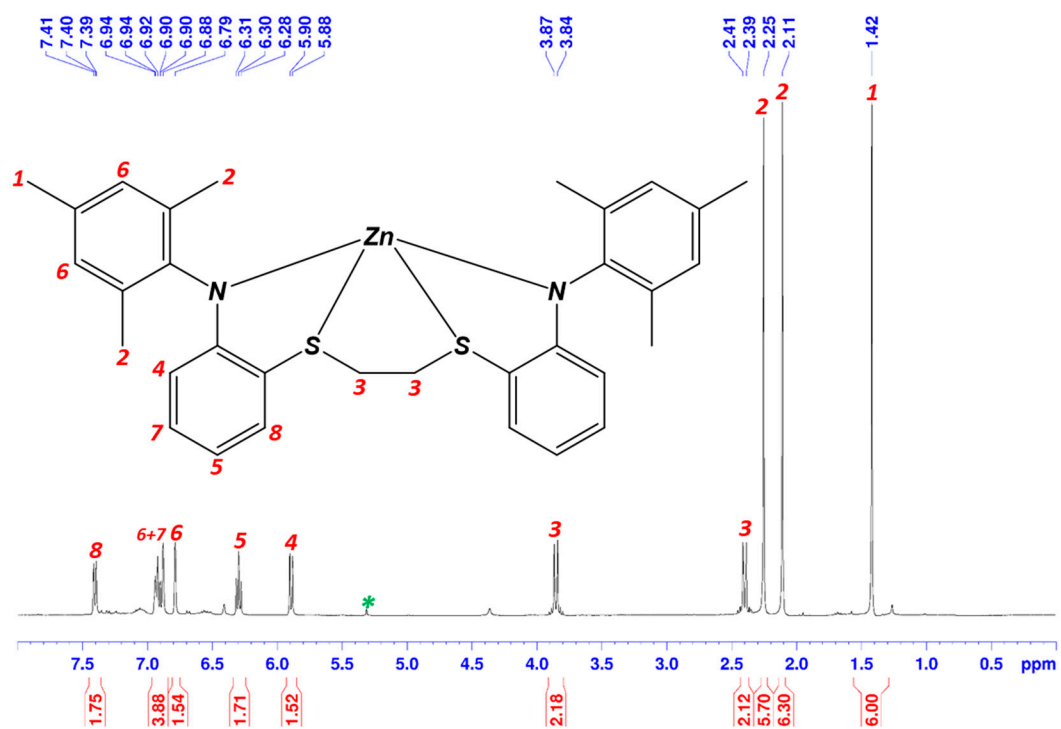

**Figure S16:**  $^1\text{H}$  NMR of  $[\text{NSSN-Mes}]_{\text{Zn}}$  (**3**) (400.13 MHz,  $^*\text{CD}_2\text{Cl}_2$ ,  $25^\circ\text{C}$ ).

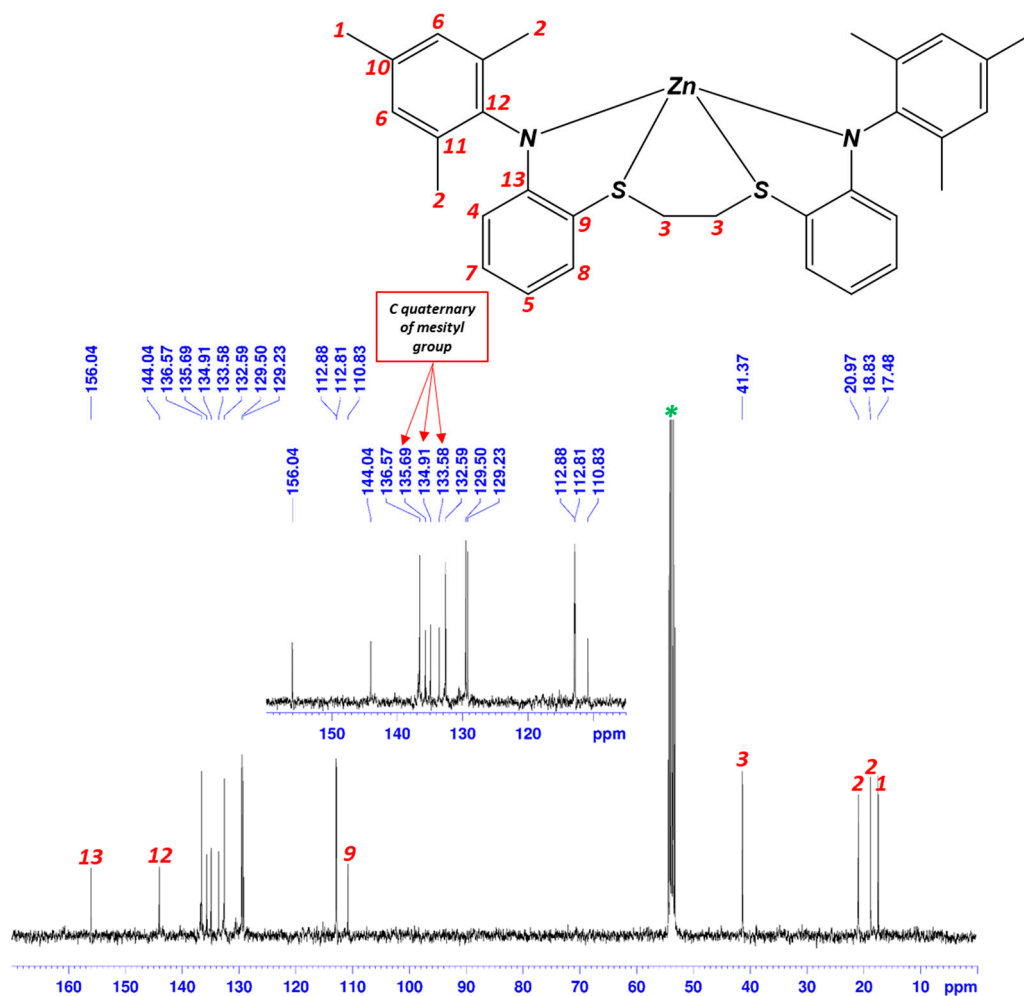

**Figure S17:**  $^{13}\text{C}$  NMR of [NSSN-Mes]Zn (**3**) (100.62 MHz,  $^*\text{CD}_2\text{Cl}_2$ , 25  $^\circ\text{C}$ ).

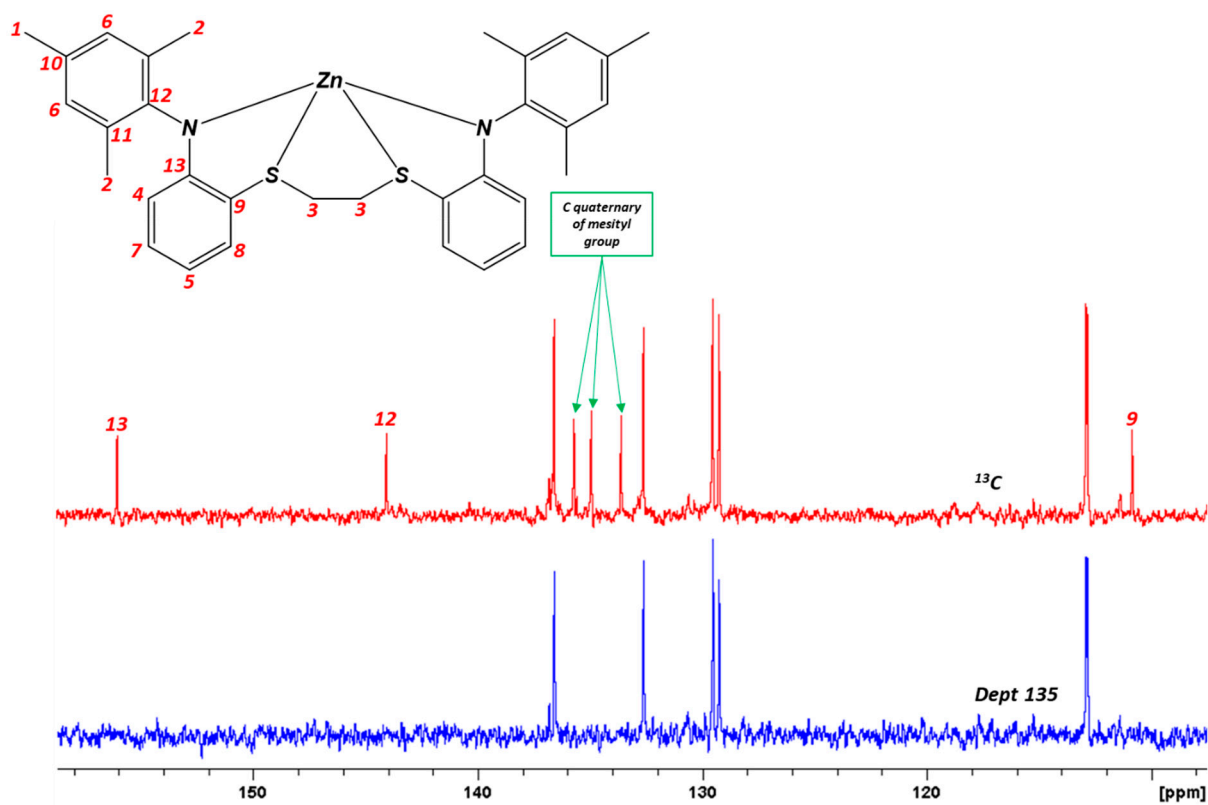

**Figure S18:** comparison between  $^{13}\text{C}$  and Dept 135 NMR of the aromatic zone of [NSSN-Mes]Zn (**3**) (100.62 MHz,  $^*\text{CD}_2\text{Cl}_2$ , 25  $^\circ\text{C}$ ).

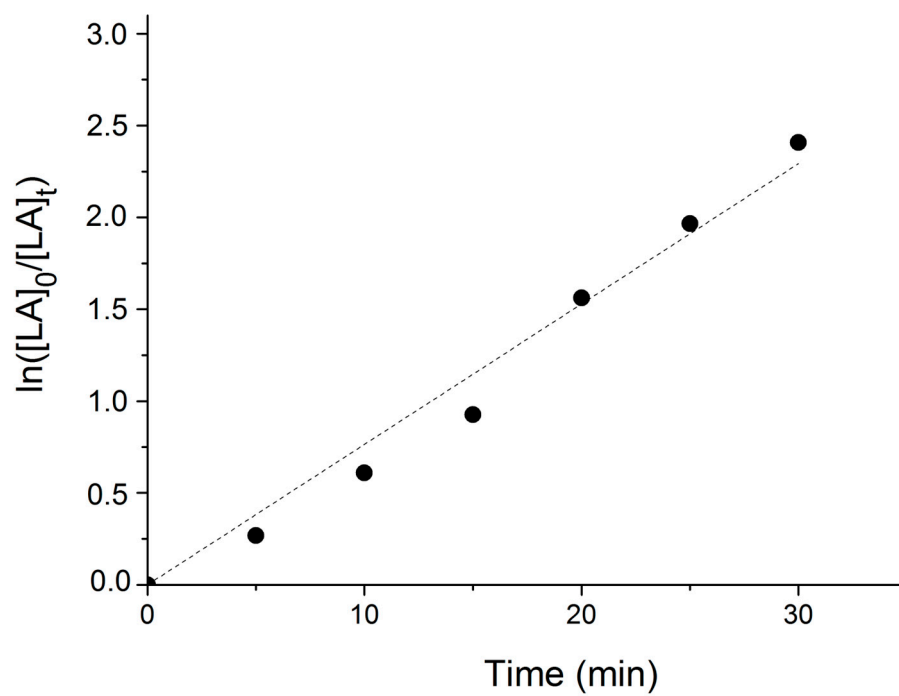

**Figure S19:** Pseudo-first-order kinetic plots for ROP of LA by **1** ( $k_{app} = 0.076 \pm 0.002 \text{ min}^{-1}$ ,  $R^2 = 0.991$  ●). Conditions:  $[LA]_0 = 0.69 \text{ M}$ ;  $[\beta BL]_0/[cat]_0 = 100$ ,  $[iPrOH]_0/[cat]_0 = 1$ ,  $T = 80 \text{ }^\circ\text{C}$ , toluene (2.0 ml) as solvent.



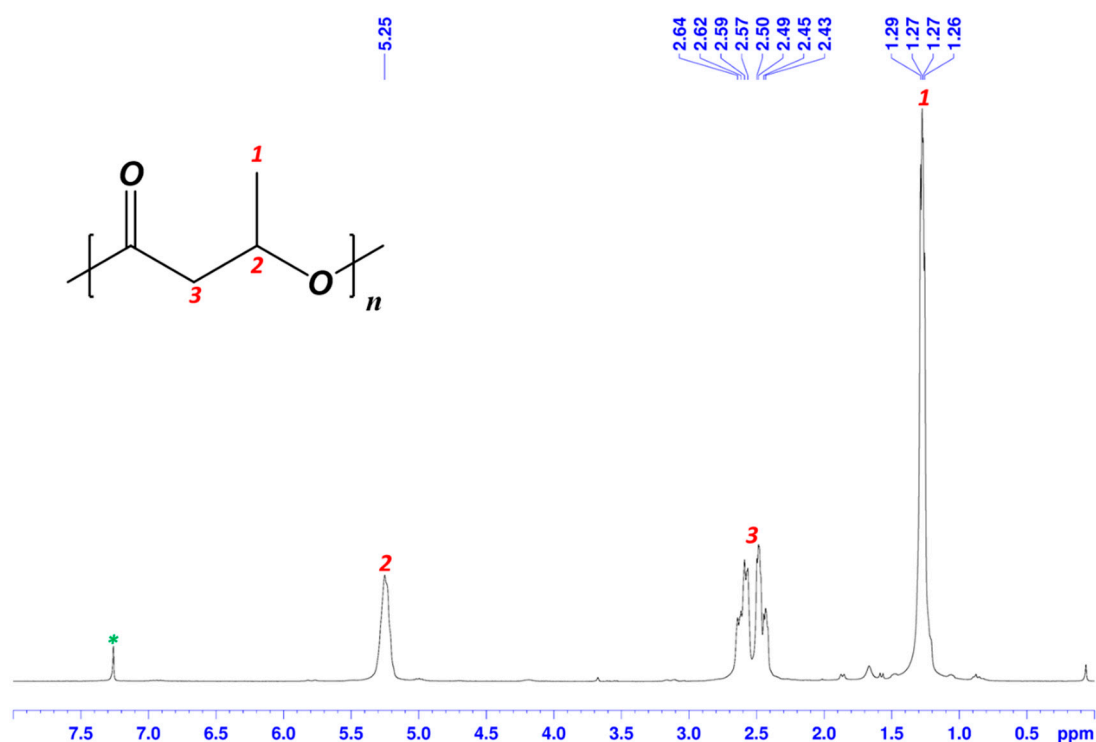

**Figure S20:** <sup>1</sup>H NMR of PBL obtained using [NSSN-iPr]<sub>2</sub>Zn (**1**) as catalyst (Table 2, Entry 1). The small peaks at 5.8 and 6.9 ppm can be assigned to the alkenic protons in trans-crotonate group, which is presumably generated during the precipitation of the polymer product. (400.13 MHz, \*CDCl<sub>3</sub>, 25°C).

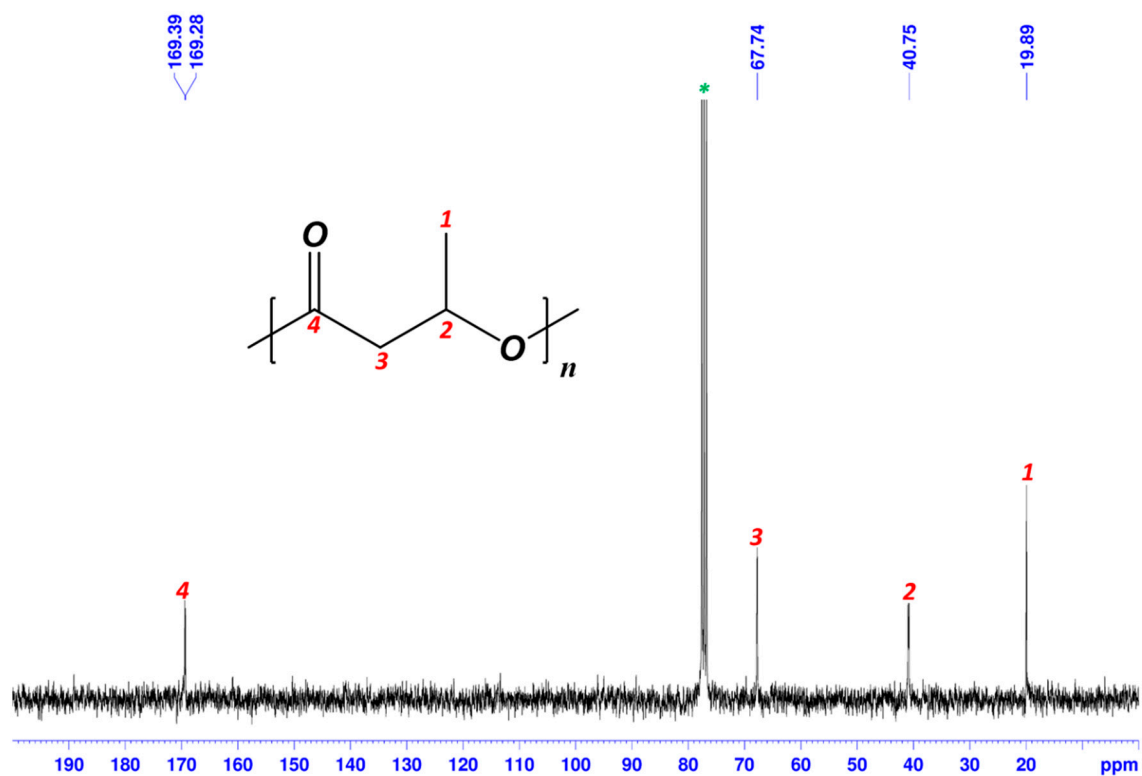

**Figure S21:** <sup>13</sup>C NMR of PBL obtained using [NSSN-iPr]<sub>2</sub>Zn (**1**) as catalyst (Table 2, Entry 1), (100.62 MHz, \*CDCl<sub>3</sub>, 25°C).

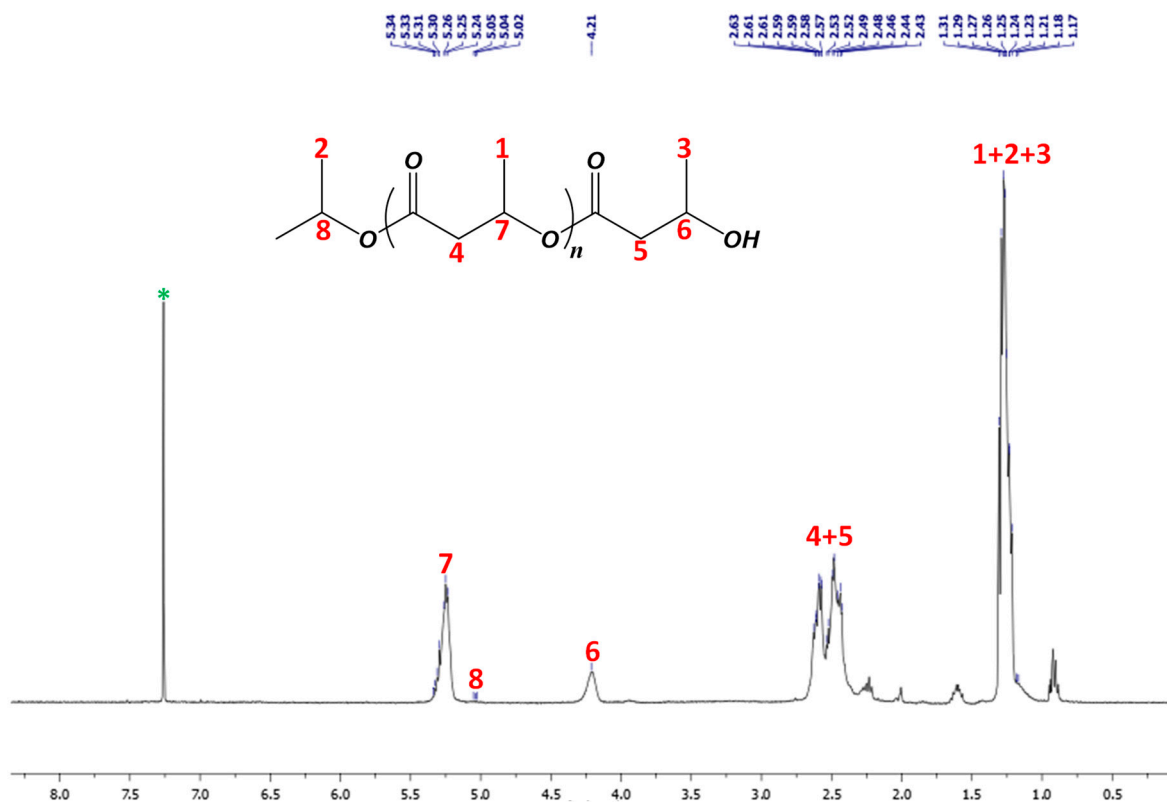

**Figure S22:**  $^1\text{H}$  NMR of oligomers of PBL obtained using  $[\text{NSSN-iPr}]\text{Zn}$  (**1**) as catalyst.  $M_{\text{n(NMR)}} = 300$  Da,  $M_{\text{n(GPC)}} = 315$  Da. (400.13 MHz,  $^*\text{CDCl}_3$ , 25°C).

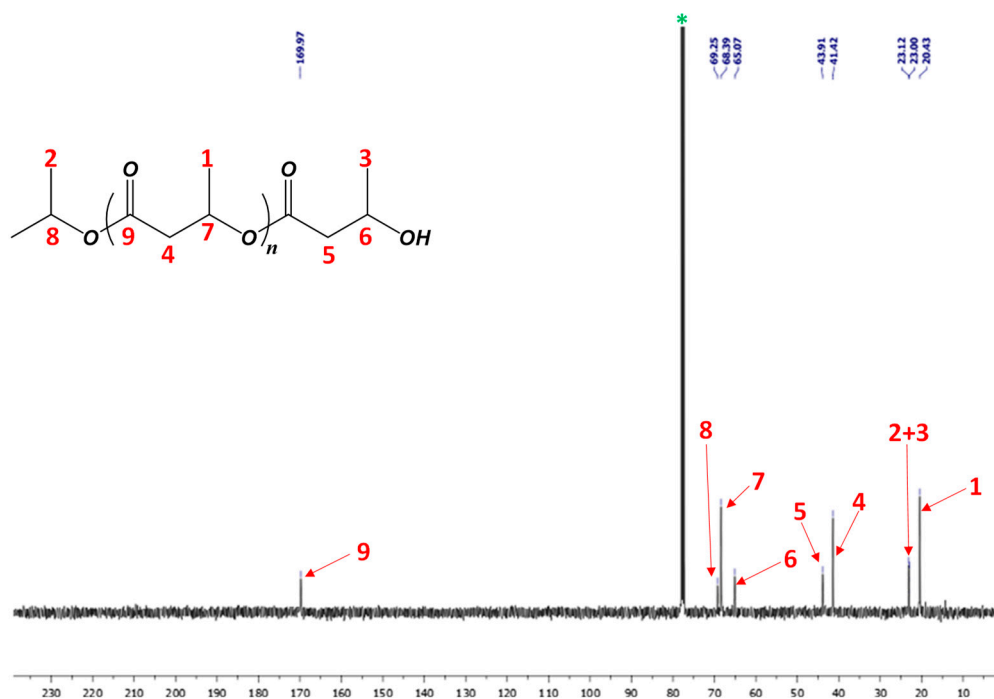

**Figure S23:**  $^{13}\text{C}$  NMR of oligomers of PBL obtained using  $[\text{NSSN-iPr}]\text{Zn}$  (**1**) as catalyst (100.62 MHz,  $^*\text{CDCl}_3$ , 25°C).

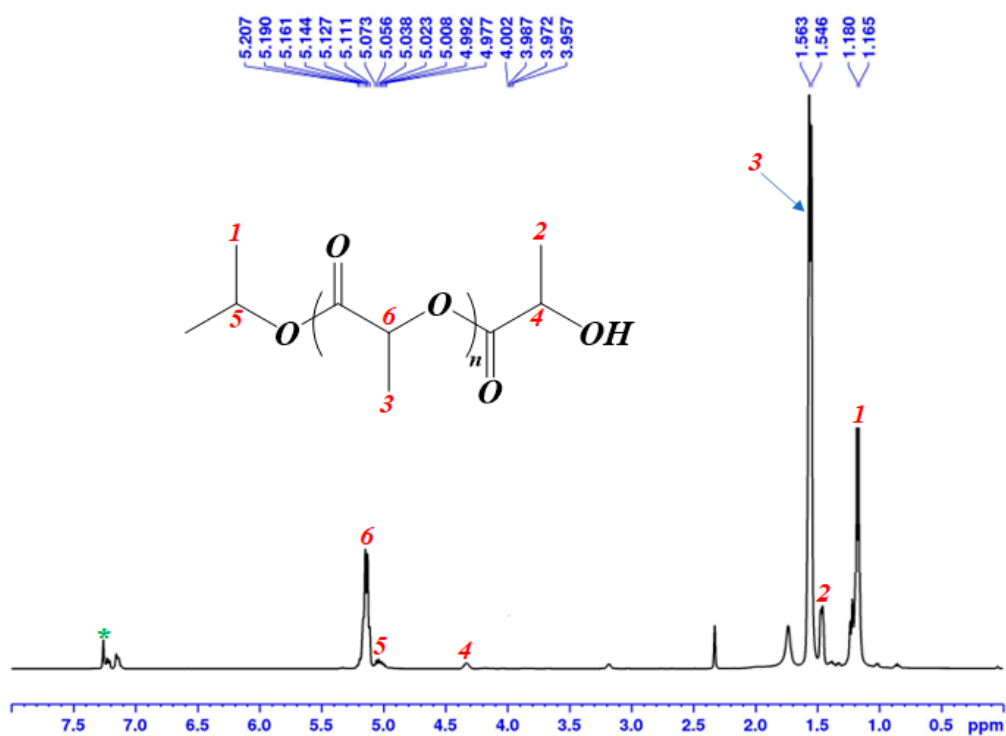

**Figure S24:**  $^1\text{H}$  NMR of oligomers of PLA obtained using [NSSN-*i*Pr]Zn (**1**) as catalyst (400.13 MHz,  $^*\text{CDCl}_3$ , 25°C).

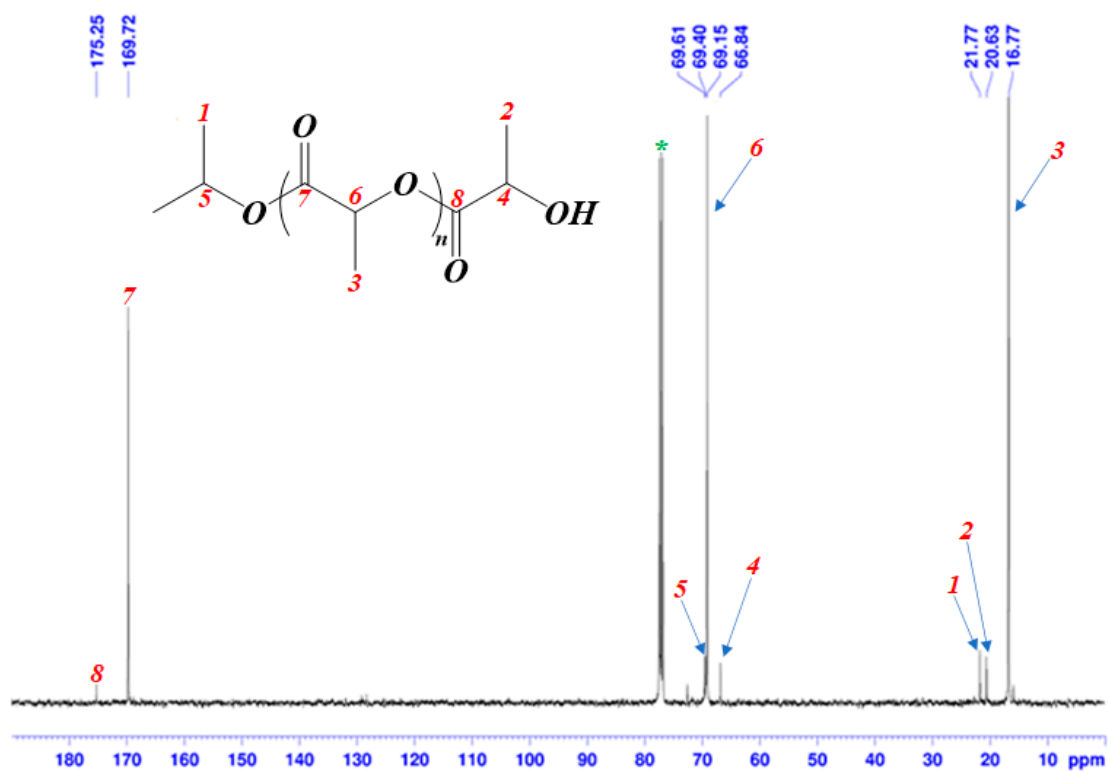

**Figure S25:**  $^{13}\text{C}$  NMR of oligomers of PLA obtained using [NSSN-*i*Pr]Zn (**1**) as catalyst (100.62 MHz,  $^*\text{CDCl}_3$ , 25°C).

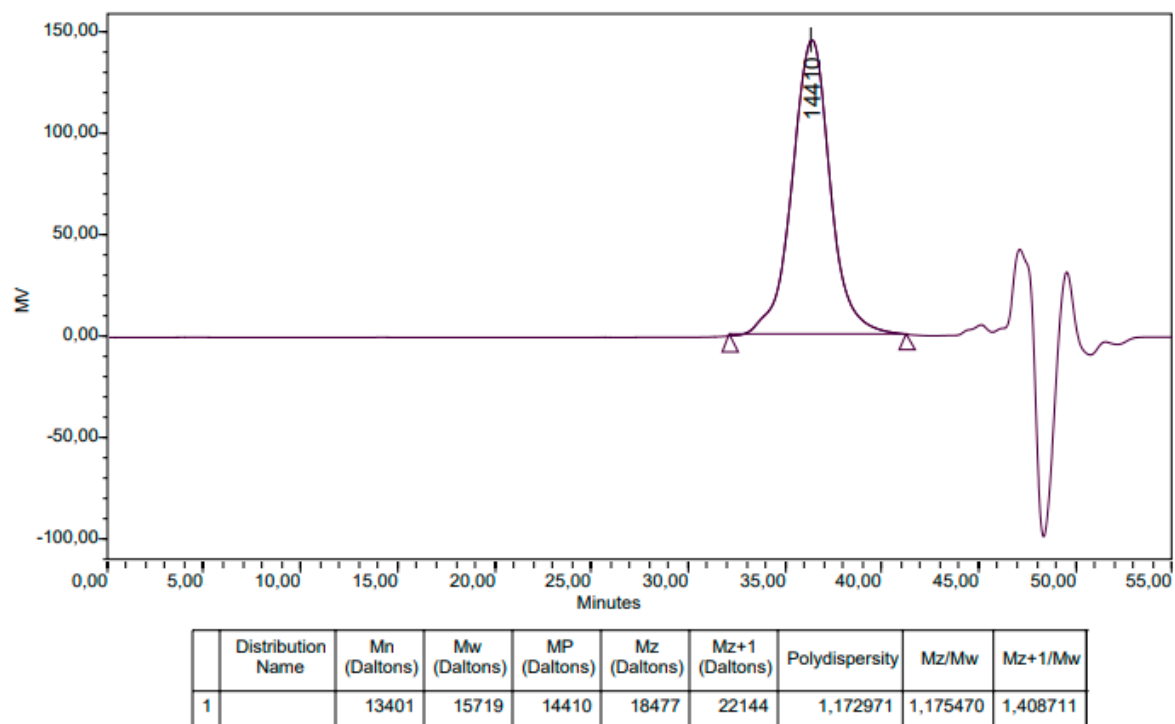

**Figure S26:** SEC of PBL obtained using [NSSN-*i*Pr]Zn (**1**) as catalyst (entry 1, Table 2).

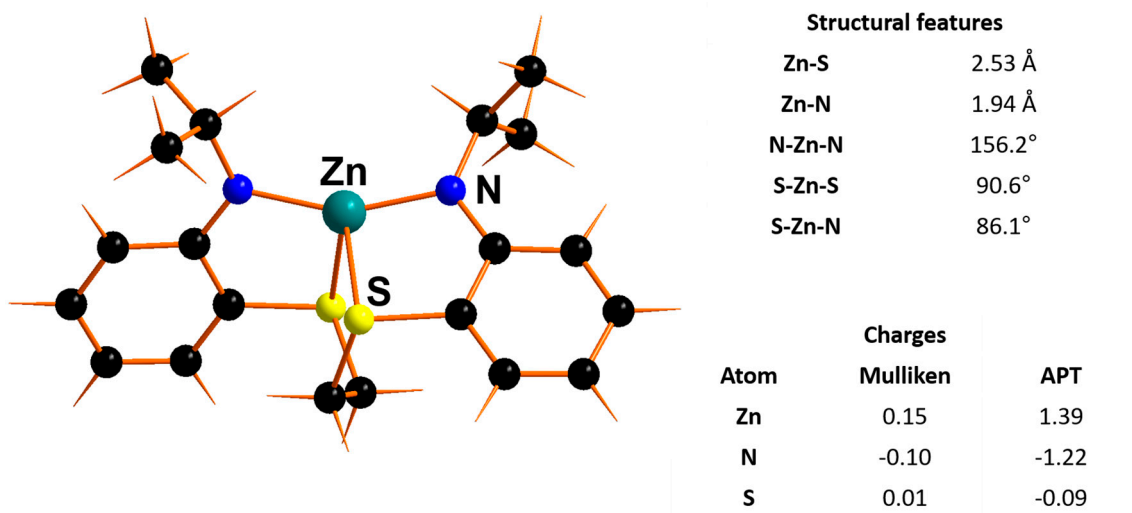

**Figure S27:** Minimum-energy structure of complex 1.

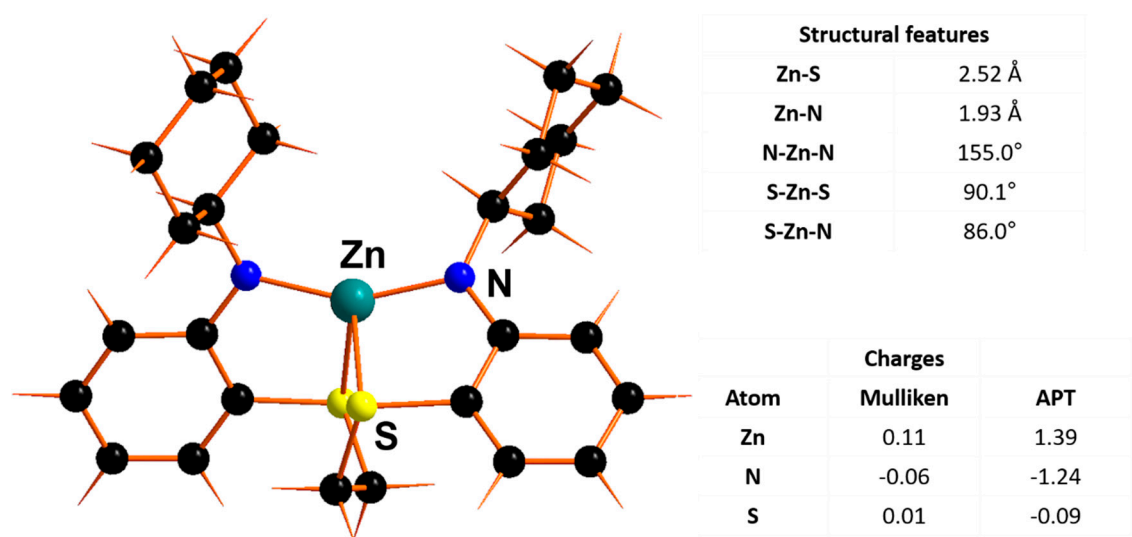

**Figure S28:** Minimum-energy structure of complex 2.



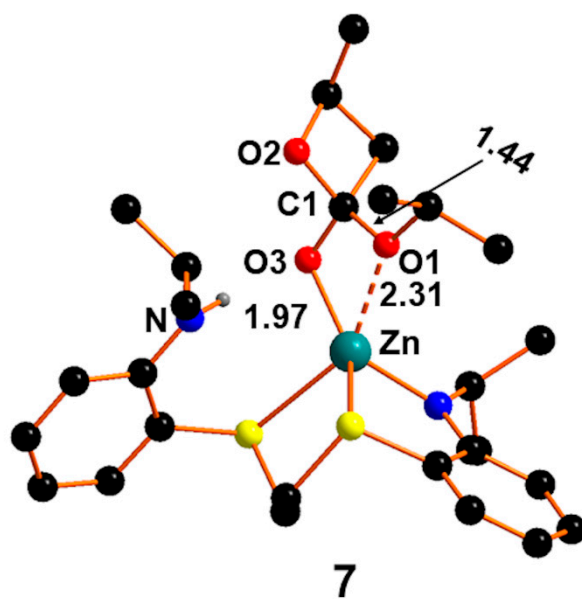

**Figure S31:** Minimum-energy structure of intermediate **7**. Hydrogen atoms, except the hydrogen bonded one, were hidden for clarity.

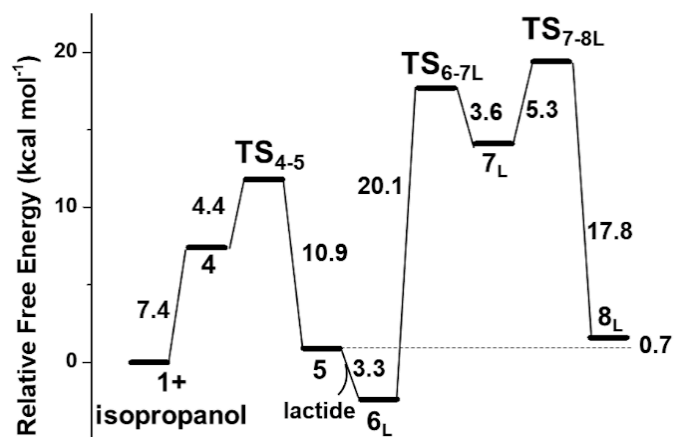

**Figure S32.** Relative free energy (kcal mol<sup>-1</sup>) pathway for the formation of **8<sub>L</sub>** starting from **1** together with isopropanol and LLA.

**Cartesian coordinates and free energies of all the structures optimized in the computational analysis (B97D level of theory).**

**Compound 1**

**Cartesian Coordinates**

|    |         |         |         |   |         |         |         |
|----|---------|---------|---------|---|---------|---------|---------|
| Zn | -0.0001 | 0.6800  | 0.0005  | C | 4.5803  | -2.0573 | 0.8879  |
| S  | -0.7009 | -1.0979 | -1.6548 | H | 5.2590  | -2.8584 | 1.1697  |
| N  | -1.8892 | 1.0750  | 0.1760  | C | 5.0006  | -0.9967 | 0.0729  |
| C  | -2.3742 | -1.0269 | -0.9819 | C | 2.2523  | 2.2586  | -0.9860 |
| C  | -2.7732 | 0.0849  | -0.1470 | C | 2.5621  | 1.9361  | -2.4629 |
| C  | -3.2610 | -2.0469 | -1.3438 | C | 3.3071  | 3.1730  | -0.3307 |
| H  | -2.9049 | -2.8444 | -1.9945 | H | 1.3325  | 2.8598  | -1.0083 |
| C  | -4.1379 | 0.0332  | 0.2825  | H | 1.7404  | 1.3480  | -2.8916 |
| H  | -4.5202 | 0.8165  | 0.9219  | H | 2.6555  | 2.8704  | -3.0333 |
| C  | 0.0772  | -2.5329 | -0.7556 | H | 3.4888  | 1.3672  | -2.5898 |
| H  | -0.3662 | -3.4529 | -1.1541 | H | 3.0106  | 3.3998  | 0.7013  |
| H  | 1.1341  | -2.4942 | -1.0446 | H | 4.3087  | 2.7331  | -0.3076 |
| C  | -4.5798 | -2.0578 | -0.8887 | H | 3.3650  | 4.1155  | -0.8918 |
| H  | -5.2584 | -2.8589 | -1.1707 | C | -2.2529 | 2.2584  | 0.9860  |
| C  | -5.0006 | -0.9971 | -0.0738 | C | -2.5632 | 1.9359  | 2.4628  |
| S  | 0.7014  | -1.0979 | 1.6552  | C | -3.3074 | 3.1727  | 0.3302  |
| N  | 1.8890  | 1.0752  | -0.1759 | H | -1.3331 | 2.8597  | 1.0087  |
| C  | 2.3745  | -1.0267 | 0.9819  | H | -1.7417 | 1.3478  | 2.8918  |
| C  | 2.7732  | 0.0852  | 0.1468  | H | -2.6568 | 2.8703  | 3.0331  |
| C  | 3.2615  | -2.0466 | 1.3435  | H | -3.4900 | 1.3671  | 2.5894  |
| H  | 2.9058  | -2.8441 | 1.9943  | H | -3.0104 | 3.3996  | -0.7016 |
| C  | 4.1378  | 0.0336  | -0.2832 | H | -4.3090 | 2.7327  | 0.3066  |
| H  | 4.5198  | 0.8169  | -0.9226 | H | -3.3657 | 4.1152  | 0.8913  |
| C  | -0.0768 | -2.5329 | 0.7561  | H | 6.0250  | -0.9689 | -0.2972 |
| H  | 0.3665  | -3.4529 | 1.1547  | H | -6.0250 | -0.9694 | 0.2959  |
| H  | -1.1337 | -2.4940 | 1.0451  |   |         |         |         |

Free Energy: -1910.729093 hartrees

**Compound iso-propanol**

**Cartesian Coordinates**

|   |         |         |         |   |         |         |         |
|---|---------|---------|---------|---|---------|---------|---------|
| O | -0.0000 | 1.4286  | 0.0246  | H | -2.1635 | -0.1444 | -0.2511 |
| H | -0.0010 | 1.4400  | 0.9933  | H | -1.2981 | -1.7055 | -0.2728 |
| C | 0.0000  | 0.0394  | -0.3786 | H | -1.2899 | -0.7070 | 1.2000  |
| C | -1.2689 | -0.6728 | 0.1003  | H | 2.1636  | -0.1441 | -0.2510 |
| C | 1.2690  | -0.6726 | 0.1004  | H | 1.2900  | -0.7068 | 1.2000  |
| H | -0.0000 | 0.0802  | -1.4756 | H | 1.2984  | -1.7053 | -0.2727 |

Free Energy: -194.231097 hartrees

**Compound 4**

**Cartesian Coordinates**

|    |         |        |         |   |        |         |        |
|----|---------|--------|---------|---|--------|---------|--------|
| Zn | -0.0007 | 0.3700 | -0.1426 | S | 0.5334 | -1.2380 | 1.7818 |
|----|---------|--------|---------|---|--------|---------|--------|



|   |         |         |         |   |         |         |         |
|---|---------|---------|---------|---|---------|---------|---------|
| N | 1.9684  | 0.3221  | -0.4593 | H | -1.8662 | 0.0090  | 3.0258  |
| C | 2.2332  | -1.4233 | 1.2406  | H | -2.7984 | 1.4337  | 3.5481  |
| C | 2.7456  | -0.6090 | 0.1595  | H | -3.6019 | 0.1175  | 2.6667  |
| C | 3.0234  | -2.3648 | 1.9126  | H | -3.1365 | 2.9470  | 0.0826  |
| H | 2.5758  | -2.9305 | 2.7286  | H | -4.3706 | 2.1861  | 1.0857  |
| C | 4.1150  | -0.8862 | -0.1712 | H | -3.2448 | 3.3388  | 1.8172  |
| H | 4.5845  | -0.3443 | -0.9789 | C | 2.4529  | 1.0990  | -1.6206 |
| C | -0.3299 | -2.6578 | 0.9250  | C | 2.7231  | 0.2453  | -2.8782 |
| H | -0.0316 | -3.5759 | 1.4449  | C | 3.6030  | 2.0853  | -1.3108 |
| H | -1.3987 | -2.4822 | 1.0956  | H | 1.6034  | 1.7334  | -1.8900 |
| C | 4.3514  | -2.5927 | 1.5536  | H | 1.8309  | -0.3461 | -3.1191 |
| H | 4.9538  | -3.3286 | 2.0804  | H | 2.9421  | 0.9044  | -3.7299 |
| C | 4.8786  | -1.8348 | 0.4975  | H | 3.5654  | -0.4431 | -2.7556 |
| S | -0.7237 | -1.4946 | -1.6809 | H | 3.4039  | 2.6078  | -0.3677 |
| N | -1.9603 | 0.5071  | 0.3168  | H | 4.5849  | 1.6090  | -1.2309 |
| C | -2.4369 | -1.3916 | -1.1520 | H | 3.6614  | 2.8307  | -2.1162 |
| C | -2.8480 | -0.3917 | -0.1904 | H | -6.1590 | -1.3602 | -0.0986 |
| C | -3.3361 | -2.3046 | -1.7171 | H | 5.9116  | -1.9842 | 0.1840  |
| H | -2.9612 | -3.0194 | -2.4482 | O | -0.2175 | 2.6458  | -0.7214 |
| C | -4.2403 | -0.4551 | 0.1506  | H | -1.1289 | 2.7756  | -0.4187 |
| H | -4.6409 | 0.2425  | 0.8720  | C | 0.6245  | 3.7137  | -0.1841 |
| C | -0.0296 | -2.8197 | -0.5581 | C | 1.0902  | 3.3739  | 1.2296  |
| H | -0.4453 | -3.7746 | -0.9004 | C | -0.1086 | 5.0503  | -0.2626 |
| H | 1.0506  | -2.8118 | -0.7466 | H | 1.4893  | 3.7267  | -0.8546 |
| C | -4.6829 | -2.3202 | -1.3549 | H | 1.5797  | 2.3930  | 1.2376  |
| H | -5.3711 | -3.0360 | -1.7978 | H | 1.8079  | 4.1284  | 1.5784  |
| C | -5.1144 | -1.3795 | -0.4084 | H | 0.2399  | 3.3624  | 1.9250  |
| C | -2.3132 | 1.4136  | 1.4290  | H | -0.4278 | 5.2610  | -1.2905 |
| C | -2.6748 | 0.6941  | 2.7449  | H | -0.9934 | 5.0393  | 0.3904  |
| C | -3.3313 | 2.5285  | 1.0806  | H | 0.5513  | 5.8593  | 0.0747  |
| H | -1.3800 | 1.9473  | 1.6495  |   |         |         |         |

Free Energy: -2104.948385 hartrees

#### Transition State TS<sub>4-5</sub>

Imaginary frequency at -1054 cm<sup>-1</sup>

Cartesian Coordinates

|    |         |         |         |   |         |         |         |
|----|---------|---------|---------|---|---------|---------|---------|
| Zn | 0.1796  | 0.4574  | 0.0141  | H | 5.4445  | -3.2740 | 1.0345  |
| S  | 0.8541  | -1.5909 | 1.4330  | C | 5.2329  | -1.3004 | 0.1398  |
| N  | 2.1266  | 0.7834  | -0.0398 | S | -0.5230 | -1.0340 | -1.8423 |
| C  | 2.5613  | -1.4345 | 0.8900  | N | -2.0009 | 0.3240  | 0.5369  |
| C  | 2.9958  | -0.2326 | 0.2139  | C | -2.2009 | -1.3441 | -1.2502 |
| C  | 3.4339  | -2.4887 | 1.1835  | C | -2.7324 | -0.6710 | -0.1020 |
| H  | 3.0463  | -3.3559 | 1.7166  | C | -2.9406 | -2.3092 | -1.9473 |
| C  | 4.3846  | -0.2370 | -0.1444 | H | -2.4997 | -2.7772 | -2.8257 |
| H  | 4.7967  | 0.6136  | -0.6690 | C | -4.0312 | -1.0888 | 0.2965  |
| C  | 0.1655  | -2.8568 | 0.2542  | H | -4.4928 | -0.6240 | 1.1564  |
| H  | 0.6504  | -3.8130 | 0.4827  | C | 0.3593  | -2.5543 | -1.2247 |
| H  | -0.8985 | -2.9305 | 0.5077  | H | 0.0023  | -3.4054 | -1.8159 |
| C  | 4.7764  | -2.4473 | 0.8064  | H | 1.4162  | -2.3755 | -1.4555 |

|   |         |         |         |   |         |         |         |
|---|---------|---------|---------|---|---------|---------|---------|
| C | -4.2129 | -2.6893 | -1.5222 | H | 3.8410  | 1.3225  | -2.3243 |
| H | -4.7740 | -3.4445 | -2.0672 | H | 3.1907  | 2.9901  | 1.1585  |
| C | -4.7465 | -2.0681 | -0.3869 | H | 4.5513  | 2.4385  | 0.1634  |
| C | -2.3264 | 0.7830  | 1.9120  | H | 3.6350  | 3.8778  | -0.3204 |
| C | -2.3800 | -0.3391 | 2.9598  | H | -5.7393 | -2.3395 | -0.0311 |
| C | -3.5479 | 1.7223  | 2.0003  | H | 6.2759  | -1.2303 | -0.1680 |
| H | -1.4623 | 1.4068  | 2.1762  | O | -0.9311 | 2.0641  | -0.7971 |
| H | -1.4630 | -0.9375 | 2.9290  | H | -1.7211 | 1.3620  | -0.1706 |
| H | -2.4683 | 0.1069  | 3.9592  | C | -0.8619 | 3.4718  | -0.5796 |
| H | -3.2340 | -1.0083 | 2.8123  | C | -0.5383 | 3.8101  | 0.8816  |
| H | -4.5060 | 1.1964  | 1.9339  | C | -2.1612 | 4.1406  | -1.0435 |
| H | -3.5256 | 2.2519  | 2.9625  | H | -0.0407 | 3.8555  | -1.2086 |
| H | -3.5115 | 2.4678  | 1.1980  | H | 0.3801  | 3.2976  | 1.1974  |
| C | 2.5366  | 2.0463  | -0.6855 | H | -0.3917 | 4.8919  | 1.0066  |
| C | 2.9197  | 1.8944  | -2.1724 | H | -1.3603 | 3.4960  | 1.5374  |
| C | 3.5498  | 2.8781  | 0.1273  | H | -2.3643 | 3.8873  | -2.0913 |
| H | 1.6231  | 2.6484  | -0.6913 | H | -3.0071 | 3.7981  | -0.4325 |
| H | 2.1082  | 1.3833  | -2.7063 | H | -2.0884 | 5.2330  | -0.9509 |
| H | 3.0571  | 2.8879  | -2.6215 |   |         |         |         |

Free energy : -2104.941390 hartrees

## Compound 5

Cartesian Coordinates

|    |         |         |         |   |         |         |         |
|----|---------|---------|---------|---|---------|---------|---------|
| Zn | 0.6265  | 0.8560  | -0.3662 | C | -4.0474 | -3.2085 | -1.5110 |
| S  | 0.6941  | -0.5250 | 1.7316  | H | -4.4105 | -4.1112 | -1.9959 |
| N  | 2.4914  | 0.3534  | -0.6293 | C | -4.8190 | -2.5363 | -0.5551 |
| C  | 2.4521  | -0.8570 | 1.4933  | C | -3.2945 | 1.1567  | 1.3439  |
| C  | 3.1444  | -0.3748 | 0.3199  | C | -3.4235 | 0.4016  | 2.6765  |
| C  | 3.0981  | -1.5863 | 2.4981  | C | -4.6094 | 1.8351  | 0.9083  |
| H  | 2.5221  | -1.9046 | 3.3658  | H | -2.5730 | 1.9658  | 1.5106  |
| C  | 4.5287  | -0.7384 | 0.2675  | H | -2.4447 | 0.0147  | 2.9857  |
| H  | 5.1254  | -0.4267 | -0.5782 | H | -3.7877 | 1.0893  | 3.4507  |
| C  | -0.0570 | -2.0829 | 1.0409  | H | -4.1232 | -0.4390 | 2.6156  |
| H  | 0.3307  | -2.9079 | 1.6498  | H | -4.4681 | 2.3441  | -0.0525 |
| H  | -1.1359 | -1.9899 | 1.2067  | H | -5.4389 | 1.1275  | 0.8045  |
| C  | 4.4510  | -1.9133 | 2.4016  | H | -4.8969 | 2.5835  | 1.6590  |
| H  | 4.9427  | -2.4826 | 3.1864  | C | 3.1390  | 0.8400  | -1.8675 |
| C  | 5.1505  | -1.4770 | 1.2677  | C | 3.5842  | -0.2872 | -2.8218 |
| S  | -0.5673 | -1.1389 | -1.5835 | C | 4.2271  | 1.9082  | -1.6330 |
| N  | -2.6437 | 0.3595  | 0.2961  | H | 2.3387  | 1.3662  | -2.4058 |
| C  | -2.2970 | -1.5336 | -1.2092 | H | 2.7413  | -0.9646 | -3.0092 |
| C  | -3.0972 | -0.7979 | -0.2755 | H | 3.8980  | 0.1487  | -3.7799 |
| C  | -2.7908 | -2.6916 | -1.8269 | H | 4.4172  | -0.8798 | -2.4307 |
| H  | -2.1607 | -3.2069 | -2.5499 | H | 3.8246  | 2.7104  | -1.0011 |
| C  | -4.3609 | -1.3676 | 0.0434  | H | 5.1251  | 1.5126  | -1.1482 |
| H  | -4.9977 | -0.8664 | 0.7598  | H | 4.5250  | 2.3422  | -2.5972 |
| C  | 0.2578  | -2.3380 | -0.4275 | H | -5.8000 | -2.9185 | -0.2771 |
| H  | -0.0821 | -3.3416 | -0.7071 | H | 6.2088  | -1.7120 | 1.1585  |
| H  | 1.3318  | -2.2494 | -0.6253 | O | -0.6928 | 2.1496  | -0.7114 |

|   |         |        |         |
|---|---------|--------|---------|
| H | -1.9604 | 0.9251 | -0.2212 |
| C | -0.5309 | 3.5149 | -0.3451 |
| C | -0.0315 | 3.6718 | 1.0997  |
| C | -1.8674 | 4.2397 | -0.5438 |
| H | 0.2171  | 3.9879 | -1.0116 |
| H | 0.9395  | 3.1715 | 1.2297  |

|   |         |        |         |
|---|---------|--------|---------|
| H | 0.0924  | 4.7319 | 1.3629  |
| H | -0.7501 | 3.2187 | 1.7973  |
| H | -2.2227 | 4.1052 | -1.5733 |
| H | -2.6217 | 3.8301 | 0.1410  |
| H | -1.7605 | 5.3152 | -0.3448 |

Free energy : -2104.958799 hartrees

## Compound 6

Cartesian Coordinates

|    |         |         |         |
|----|---------|---------|---------|
| Zn | 0.7012  | 0.3394  | 0.4647  |
| S  | 1.8256  | -1.7639 | 1.1334  |
| N  | 2.4478  | 0.9626  | -0.1705 |
| C  | 3.4279  | -1.1409 | 0.5802  |
| C  | 3.5418  | 0.1665  | -0.0264 |
| C  | 4.5316  | -1.9799 | 0.7698  |
| H  | 4.3799  | -2.9458 | 1.2493  |
| C  | 4.8706  | 0.5040  | -0.4420 |
| H  | 5.0482  | 1.4578  | -0.9192 |
| C  | 1.3040  | -2.7711 | -0.3465 |
| H  | 2.0458  | -3.5714 | -0.4491 |
| H  | 0.3353  | -3.2078 | -0.0783 |
| C  | 5.8080  | -1.6021 | 0.3515  |
| H  | 6.6593  | -2.2613 | 0.5010  |
| C  | 5.9537  | -0.3478 | -0.2587 |
| S  | -0.2026 | -0.7810 | -1.6969 |
| N  | -1.9520 | -1.3044 | 0.7643  |
| C  | -1.5723 | -1.9473 | -1.5387 |
| C  | -2.2528 | -2.1194 | -0.3020 |
| C  | -1.8855 | -2.7183 | -2.6638 |
| H  | -1.3620 | -2.5258 | -3.5987 |
| C  | -3.1998 | -3.1772 | -0.2540 |
| H  | -3.7407 | -3.3611 | 0.6640  |
| C  | 1.2139  | -1.9853 | -1.6490 |
| H  | 1.0740  | -2.6812 | -2.4834 |
| H  | 2.1171  | -1.3897 | -1.8218 |
| C  | -2.8344 | -3.7396 | -2.5942 |
| H  | -3.0668 | -4.3370 | -3.4722 |
| C  | -3.4784 | -3.9654 | -1.3681 |
| C  | -2.4333 | -1.3953 | 2.1504  |
| C  | -2.0165 | -2.7016 | 2.8455  |
| C  | -3.9308 | -1.0691 | 2.3230  |
| H  | -1.8813 | -0.5871 | 2.6477  |
| H  | -0.9327 | -2.8464 | 2.7550  |
| H  | -2.2737 | -2.6423 | 3.9108  |
| H  | -2.5171 | -3.5808 | 2.4268  |
| H  | -4.1707 | -0.1311 | 1.8079  |
| H  | -4.5831 | -1.8545 | 1.9269  |

|   |         |         |         |
|---|---------|---------|---------|
| H | -4.1564 | -0.9488 | 3.3912  |
| C | 2.4941  | 2.3145  | -0.7637 |
| C | 2.8266  | 2.3233  | -2.2697 |
| C | 3.3161  | 3.3351  | 0.0501  |
| H | 1.4575  | 2.6770  | -0.7004 |
| H | 2.1481  | 1.6427  | -2.7999 |
| H | 2.6860  | 3.3363  | -2.6713 |
| H | 3.8548  | 2.0140  | -2.4831 |
| H | 2.9872  | 3.3205  | 1.0971  |
| H | 4.3924  | 3.1381  | 0.0293  |
| H | 3.1477  | 4.3429  | -0.3535 |
| H | -4.2221 | -4.7557 | -1.2789 |
| H | 6.9356  | -0.0212 | -0.5996 |
| O | -0.8879 | 1.1481  | 1.0819  |
| H | -1.6030 | -0.3656 | 0.5604  |
| C | -0.9260 | 2.0153  | 2.2045  |
| C | -0.0429 | 1.5221  | 3.3616  |
| C | -2.3805 | 2.1703  | 2.6666  |
| H | -0.5516 | 3.0172  | 1.9068  |
| H | 1.0124  | 1.4674  | 3.0561  |
| H | -0.1113 | 2.1980  | 4.2260  |
| H | -0.3688 | 0.5194  | 3.6738  |
| H | -3.0218 | 2.4681  | 1.8298  |
| H | -2.7515 | 1.2137  | 3.0612  |
| H | -2.4544 | 2.9265  | 3.4609  |
| C | -2.8516 | 2.0406  | -1.4146 |
| C | -1.5950 | 2.8920  | -1.5342 |
| C | -2.3561 | 3.8773  | -0.6276 |
| H | -0.7232 | 2.4187  | -1.0794 |
| H | -1.9635 | 3.9262  | 0.3914  |
| O | -3.5327 | 2.9373  | -0.6208 |
| O | -3.2489 | 0.9759  | -1.8029 |
| C | -2.7230 | 5.2325  | -1.1852 |
| H | -3.4662 | 5.7282  | -0.5486 |
| H | -1.8240 | 5.8626  | -1.2246 |
| H | -3.1288 | 5.1353  | -2.2003 |
| H | -1.3813 | 3.2436  | -2.5494 |

Free Energy: -2411.273339 hartrees

**Transition State TS<sub>6-7</sub>**

Imaginary Frequency at -173 cm<sup>-1</sup>

Cartesian Coordinates

|    |         |         |         |   |         |         |         |
|----|---------|---------|---------|---|---------|---------|---------|
| Zn | 0.1790  | -0.0071 | 0.2706  | H | -3.9185 | 0.4424  | 3.3609  |
| S  | 1.0190  | -2.3125 | 0.9774  | C | 2.5005  | 1.7274  | -0.5043 |
| N  | 2.1512  | 0.3769  | -0.0151 | C | 2.8735  | 1.7546  | -2.0003 |
| C  | 2.7364  | -1.8896 | 0.6772  | C | 3.5164  | 2.5314  | 0.3456  |
| C  | 3.0896  | -0.5873 | 0.1634  | H | 1.5657  | 2.2834  | -0.4084 |
| C  | 3.6868  | -2.8837 | 0.9413  | H | 2.1061  | 1.2422  | -2.5943 |
| H  | 3.3492  | -3.8341 | 1.3525  | H | 2.9415  | 2.7944  | -2.3489 |
| C  | 4.4891  | -0.4440 | -0.1248 | H | 3.8340  | 1.2653  | -2.1968 |
| H  | 4.8453  | 0.4770  | -0.5621 | H | 3.3708  | 2.3421  | 1.4146  |
| C  | 0.6129  | -3.1981 | -0.6085 | H | 4.5625  | 2.3181  | 0.1034  |
| H  | 1.3150  | -4.0368 | -0.6775 | H | 3.3499  | 3.6016  | 0.1625  |
| H  | -0.4010 | -3.5924 | -0.4829 | H | -4.9909 | -3.9951 | -0.3895 |
| C  | 5.0405  | -2.6803 | 0.6760  | H | 6.4641  | -1.2554 | -0.1130 |
| H  | 5.7722  | -3.4567 | 0.8845  | O | -0.5140 | 1.9300  | 0.6221  |
| C  | 5.4183  | -1.4450 | 0.1277  | H | -2.3318 | 0.3881  | 0.1902  |
| S  | -0.4857 | -0.9445 | -1.9761 | C | -0.2251 | 2.7433  | 1.7936  |
| N  | -2.0550 | -0.5419 | 0.6237  | C | 0.7019  | 1.9462  | 2.7100  |
| C  | -1.9864 | -1.8062 | -1.4720 | C | -1.4883 | 3.1750  | 2.5458  |
| C  | -2.5691 | -1.5826 | -0.1974 | H | 0.2967  | 3.6423  | 1.4363  |
| C  | -2.4995 | -2.7737 | -2.3466 | H | 1.5741  | 1.5706  | 2.1677  |
| H  | -2.0376 | -2.9066 | -3.3226 | H | 1.0394  | 2.5862  | 3.5352  |
| C  | -3.6578 | -2.4041 | 0.1560  | H | 0.1656  | 1.0900  | 3.1446  |
| H  | -4.1459 | -2.2626 | 1.1098  | H | -2.1791 | 3.7070  | 1.8893  |
| C  | 0.7335  | -2.3553 | -1.8706 | H | -2.0041 | 2.3106  | 2.9797  |
| H  | 0.5804  | -2.9904 | -2.7503 | H | -1.1917 | 3.8441  | 3.3659  |
| H  | 1.7164  | -1.8756 | -1.9366 | C | -1.6003 | 2.5323  | -0.5677 |
| C  | -3.5755 | -3.5749 | -1.9678 | C | -0.7733 | 2.5892  | -1.8910 |
| H  | -3.9646 | -4.3271 | -2.6498 | C | -0.5359 | 4.0635  | -1.5468 |
| C  | -4.1458 | -3.3867 | -0.7051 | H | 0.0997  | 1.9439  | -1.9833 |
| C  | -2.4193 | -0.4265 | 2.0743  | H | 0.4680  | 4.2421  | -1.1279 |
| C  | -2.1239 | -1.6813 | 2.8997  | O | -1.5235 | 4.0078  | -0.4636 |
| C  | -3.8284 | 0.1443  | 2.3077  | O | -2.7244 | 1.9677  | -0.4371 |
| H  | -1.7260 | 0.3456  | 2.4199  | C | -0.8790 | 5.1126  | -2.5870 |
| H  | -1.0920 | -2.0146 | 2.7501  | H | -0.8691 | 6.1183  | -2.1459 |
| H  | -2.2541 | -1.4332 | 3.9605  | H | -0.1422 | 5.0850  | -3.4025 |
| H  | -2.7922 | -2.5166 | 2.6684  | H | -1.8758 | 4.9183  | -3.0033 |
| H  | -3.9717 | 1.0301  | 1.6793  | H | -1.4370 | 2.4560  | -2.7525 |
| H  | -4.6278 | -0.5737 | 2.0952  |   |         |         |         |

Free Energy: -2411.239149 hartrees

**Compound 7**

Cartesian Coordinates

|    |         |         |         |   |         |         |         |
|----|---------|---------|---------|---|---------|---------|---------|
| Zn | 0.4726  | 0.0218  | -0.5687 | H | -4.5284 | 2.4518  | 1.5426  |
| S  | 0.5561  | -1.1860 | 1.5933  | C | 2.9692  | -0.1355 | -2.1117 |
| N  | 2.3303  | -0.5586 | -0.8499 | C | 3.5014  | -1.3029 | -2.9682 |
| C  | 2.3202  | -1.5093 | 1.3944  | C | 3.9871  | 1.0114  | -1.9418 |
| C  | 3.0049  | -1.1417 | 0.1739  | H | 2.1491  | 0.2971  | -2.7012 |
| C  | 2.9813  | -2.0947 | 2.4802  | H | 2.7088  | -2.0501 | -3.1038 |
| H  | 2.4091  | -2.3307 | 3.3763  | H | 3.7946  | -0.9256 | -3.9574 |
| C  | 4.4046  | -1.4522 | 0.1746  | H | 4.3689  | -1.8034 | -2.5265 |
| H  | 4.9983  | -1.2126 | -0.6966 | H | 3.5150  | 1.8396  | -1.3985 |
| C  | -0.1897 | -2.7930 | 1.0225  | H | 4.8838  | 0.7103  | -1.3908 |
| H  | 0.2493  | -3.5770 | 1.6500  | H | 4.2994  | 1.3759  | -2.9301 |
| H  | -1.2604 | -2.7154 | 1.2436  | H | -5.9702 | -3.2107 | 0.4494  |
| C  | 4.3463  | -2.3799 | 2.4292  | H | 6.1093  | -2.2518 | 1.1836  |
| H  | 4.8505  | -2.8383 | 3.2762  | O | 0.5026  | 2.1459  | 0.3345  |
| C  | 5.0414  | -2.0479 | 1.2568  | H | -2.0526 | 0.3715  | -0.5706 |
| S  | -0.8298 | -1.9682 | -1.6173 | C | 0.9390  | 3.0767  | 1.3560  |
| N  | -2.6437 | -0.0672 | 0.1343  | C | 2.3502  | 2.6567  | 1.7591  |
| C  | -2.5297 | -2.2072 | -1.0370 | C | -0.0419 | 3.0580  | 2.5274  |
| C  | -3.2007 | -1.2809 | -0.1769 | H | 0.9648  | 4.0810  | 0.9136  |
| C  | -3.1286 | -3.4237 | -1.3937 | H | 3.0280  | 2.6992  | 0.8985  |
| H  | -2.5983 | -4.0902 | -2.0717 | H | 2.7296  | 3.3208  | 2.5464  |
| C  | -4.4466 | -1.7099 | 0.3542  | H | 2.3425  | 1.6288  | 2.1443  |
| H  | -4.9881 | -1.0500 | 1.0192  | H | -1.0408 | 3.3460  | 2.1851  |
| C  | 0.0442  | -3.1234 | -0.4466 | H | -0.0863 | 2.0495  | 2.9591  |
| H  | -0.3167 | -4.1366 | -0.6561 | H | 0.2883  | 3.7584  | 3.3066  |
| H  | 1.1050  | -3.0487 | -0.7096 | C | -0.2982 | 2.5626  | -0.7989 |
| C  | -4.3640 | -3.8064 | -0.8709 | C | 0.2432  | 3.7508  | -1.6412 |
| H  | -4.8108 | -4.7567 | -1.1525 | C | -1.0672 | 4.4674  | -1.2690 |
| C  | -5.0075 | -2.9380 | 0.0199  | H | 1.1432  | 4.2248  | -1.2347 |
| C  | -3.0783 | 0.8877  | 1.1657  | H | -1.7779 | 4.5231  | -2.1061 |
| C  | -3.0799 | 0.2776  | 2.5751  | O | -1.4539 | 3.3671  | -0.3725 |
| C  | -4.3861 | 1.6293  | 0.8288  | O | -0.6114 | 1.4225  | -1.4255 |
| H  | -2.2883 | 1.6434  | 1.1477  | H | 0.3847  | 3.5026  | -2.6964 |
| H  | -2.1062 | -0.1790 | 2.7904  | C | -0.9826 | 5.8028  | -0.5536 |
| H  | -3.2601 | 1.0735  | 3.3090  | H | -0.2534 | 5.7609  | 0.2655  |
| H  | -3.8563 | -0.4841 | 2.7064  | H | -0.6725 | 6.5845  | -1.2612 |
| H  | -4.3209 | 2.0563  | -0.1787 | H | -1.9604 | 6.0808  | -0.1386 |
| H  | -5.2684 | 0.9811  | 0.8788  |   |         |         |         |

Free Energy: -2411.260720 hartrees

#### Transition State TS<sub>7-8</sub>

Imaginary Frequency at -102 cm<sup>-1</sup>

Cartesian Coordinates

|    |         |         |         |   |         |         |         |
|----|---------|---------|---------|---|---------|---------|---------|
| Zn | 0.6374  | 0.0177  | -0.1426 | H | 0.8730  | -3.5380 | 3.3053  |
| S  | -0.0926 | -1.4084 | 1.7406  | C | 3.1527  | -3.3916 | 0.1768  |
| N  | 1.8801  | -1.4233 | -0.6359 | H | 3.8138  | -3.3801 | -0.6786 |
| C  | 1.2958  | -2.5287 | 1.4580  | C | -1.4815 | -2.3635 | 0.9481  |
| C  | 2.1187  | -2.4030 | 0.2739  | H | -1.5720 | -3.2931 | 1.5223  |
| C  | 1.5208  | -3.5094 | 2.4303  | H | -2.3792 | -1.7547 | 1.0980  |

|   |         |         |         |   |         |         |         |
|---|---------|---------|---------|---|---------|---------|---------|
| C | 2.5466  | -4.4452 | 2.2911  | H | 2.9766  | -2.1499 | -3.8299 |
| H | 2.7130  | -5.2047 | 3.0507  | H | 2.9501  | -3.3530 | -2.5255 |
| C | 3.3530  | -4.3673 | 1.1459  | H | 4.1749  | -0.0104 | -0.9445 |
| S | -1.3811 | -1.2166 | -1.6442 | H | 4.7427  | -1.6654 | -1.2379 |
| N | -2.6931 | 0.8460  | 0.3082  | H | 4.5800  | -0.5367 | -2.5979 |
| C | -3.1359 | -0.8290 | -1.4059 | H | -6.9574 | -0.4219 | -0.8545 |
| C | -3.5949 | 0.1167  | -0.4361 | H | 4.1635  | -5.0818 | 1.0040  |
| C | -4.0467 | -1.5617 | -2.1779 | O | 1.6461  | 3.0766  | -1.2097 |
| H | -3.6593 | -2.2583 | -2.9192 | H | -1.8299 | 1.0954  | -0.1719 |
| C | -4.9991 | 0.2161  | -0.2645 | C | 2.7635  | 3.8985  | -0.7446 |
| H | -5.3974 | 0.9179  | 0.4562  | C | 2.4843  | 5.3599  | -1.0855 |
| C | -1.2670 | -2.6894 | -0.5253 | C | 4.0187  | 3.3617  | -1.4237 |
| H | -2.0285 | -3.4072 | -0.8516 | H | 2.8631  | 3.7685  | 0.3391  |
| H | -0.2729 | -3.1156 | -0.6955 | H | 1.5665  | 5.7105  | -0.5982 |
| C | -5.4254 | -1.4351 | -1.9947 | H | 3.3206  | 5.9885  | -0.7525 |
| H | -6.1172 | -2.0174 | -2.5985 | H | 2.3694  | 5.4758  | -2.1709 |
| C | -5.8883 | -0.5433 | -1.0213 | H | 4.1805  | 2.3129  | -1.1516 |
| C | -2.9951 | 1.7664  | 1.4120  | H | 3.9201  | 3.4348  | -2.5145 |
| C | -3.6613 | 1.0687  | 2.6083  | H | 4.8914  | 3.9495  | -1.1104 |
| C | -3.7203 | 3.0577  | 0.9831  | C | 0.7588  | 2.5737  | -0.2939 |
| H | -2.0006 | 2.0692  | 1.7580  | C | 0.3248  | 3.4142  | 0.9379  |
| H | -3.0678 | 0.1981  | 2.9134  | C | 0.8693  | 2.3334  | 1.8847  |
| H | -3.7106 | 1.7695  | 3.4514  | H | 0.8603  | 4.3634  | 1.0357  |
| H | -4.6798 | 0.7319  | 2.3907  | H | 0.0745  | 1.6982  | 2.3022  |
| H | -3.1899 | 3.5235  | 0.1431  | O | 1.5780  | 1.6023  | 0.8220  |
| H | -4.7550 | 2.8748  | 0.6742  | O | -0.1176 | 1.7750  | -0.8501 |
| H | -3.7363 | 3.7664  | 1.8222  | H | -0.7528 | 3.5976  | 0.9545  |
| C | 2.6611  | -1.2558 | -1.8774 | C | 1.8129  | 2.7819  | 2.9843  |
| C | 2.5003  | -2.4189 | -2.8773 | H | 2.6096  | 3.4138  | 2.5705  |
| C | 4.1326  | -0.8530 | -1.6457 | H | 1.2621  | 3.3603  | 3.7393  |
| H | 2.2019  | -0.3898 | -2.3721 | H | 2.2708  | 1.9139  | 3.4751  |
| H | 1.4340  | -2.6005 | -3.0626 |   |         |         |         |

Free Energy: -2411.253205 hartrees

### Compound 8

Cartesian Coordinates

|    |         |         |         |   |         |        |         |
|----|---------|---------|---------|---|---------|--------|---------|
| Zn | -0.8218 | -0.6440 | 0.5138  | H | -6.7142 | 2.2626 | 0.3314  |
| S  | -1.9342 | 1.6174  | 1.1635  | C | -6.0606 | 0.2868 | -0.3082 |
| N  | -2.6278 | -1.1836 | -0.0155 | S | 0.0065  | 0.6811 | -1.6962 |
| C  | -3.5333 | 1.0166  | 0.5914  | N | 1.7243  | 1.9167 | 0.6783  |
| C  | -3.6788 | -0.3146 | 0.0492  | C | 1.4402  | 1.7880 | -1.7468 |
| C  | -4.6110 | 1.9049  | 0.6936  | C | 2.1001  | 2.2962 | -0.5800 |
| H  | -4.4353 | 2.8864  | 1.1318  | C | 1.8635  | 2.1640 | -3.0297 |
| C  | -5.0060 | -0.6130 | -0.4054 | H | 1.3484  | 1.7409 | -3.8900 |
| H  | -5.2086 | -1.5766 | -0.8495 | C | 3.1400  | 3.2386 | -0.8094 |
| C  | -1.4462 | 2.6772  | -0.2848 | H | 3.6560  | 3.6706 | 0.0375  |
| H  | -2.1987 | 3.4710  | -0.3642 | C | -1.3694 | 1.9186 | -1.6037 |
| H  | -0.4807 | 3.1179  | -0.0173 | H | -1.2258 | 2.6226 | -2.4318 |
| C  | -5.8869 | 1.5625  | 0.2460  | H | -2.2889 | 1.3465 | -1.7765 |

|   |         |         |         |   |        |         |         |
|---|---------|---------|---------|---|--------|---------|---------|
| C | 2.9037  | 3.0746  | -3.2219 | O | 2.4126 | -3.1493 | -0.8844 |
| H | 3.2120  | 3.3564  | -4.2256 | H | 1.1502 | 1.0796  | 0.7854  |
| C | 3.5283  | 3.6139  | -2.0913 | C | 3.7253 | -3.6624 | -0.4400 |
| C | 2.2735  | 2.3629  | 1.9659  | C | 4.6325 | -2.5031 | -0.0433 |
| C | 1.9904  | 3.8471  | 2.2553  | C | 4.2651 | -4.4548 | -1.6230 |
| C | 3.7508  | 1.9847  | 2.1937  | H | 3.5573 | -4.3382 | 0.4073  |
| H | 1.6883  | 1.7805  | 2.6864  | H | 4.2377 | -1.9574 | 0.8196  |
| H | 0.9164  | 4.0500  | 2.1628  | H | 5.6249 | -2.8928 | 0.2161  |
| H | 2.3026  | 4.0845  | 3.2807  | H | 4.7369 | -1.8062 | -0.8841 |
| H | 2.5275  | 4.5169  | 1.5748  | H | 3.5755 | -5.2605 | -1.8993 |
| H | 3.9072  | 0.9232  | 1.9690  | H | 4.4102 | -3.7952 | -2.4873 |
| H | 4.4401  | 2.5721  | 1.5779  | H | 5.2322 | -4.8948 | -1.3501 |
| H | 4.0087  | 2.1572  | 3.2469  | C | 1.4511 | -2.7316 | -0.0415 |
| C | -2.7808 | -2.5719 | -0.5087 | C | 1.6537 | -2.6751 | 1.4463  |
| C | -3.0501 | -2.6698 | -2.0249 | C | 1.7630 | -1.1804 | 1.9246  |
| C | -3.7173 | -3.4526 | 0.3462  | H | 0.7652 | -3.1021 | 1.9266  |
| H | -1.7909 | -3.0162 | -0.3761 | H | 2.5544 | -0.7042 | 1.3101  |
| H | -2.2771 | -2.1100 | -2.5664 | O | 0.5737 | -0.4663 | 1.8056  |
| H | -2.9973 | -3.7218 | -2.3382 | O | 0.4037 | -2.3401 | -0.5565 |
| H | -4.0275 | -2.2763 | -2.3225 | H | 2.5364 | -3.2247 | 1.7800  |
| H | -3.4303 | -3.3731 | 1.4030  | C | 2.2328 | -1.1797 | 3.3868  |
| H | -4.7763 | -3.1900 | 0.2636  | H | 1.5067 | -1.7169 | 4.0115  |
| H | -3.6040 | -4.5003 | 0.0349  | H | 3.2171 | -1.6584 | 3.4884  |
| H | 4.3367  | 4.3348  | -2.2041 | H | 2.3057 | -0.1469 | 3.7457  |
| H | -7.0399 | -0.0191 | -0.6754 |   |        |         |         |

Free Energy: -2411.294356 hartrees

### Compound rac- $\beta$ -butyrolactone

Cartesian Coordinates

|   |           |           |           |   |           |           |           |
|---|-----------|-----------|-----------|---|-----------|-----------|-----------|
| C | 1.076034  | -0.008436 | -0.038350 | O | 2.231256  | -0.174844 | -0.318174 |
| C | 0.099427  | 1.157810  | 0.091815  | C | -2.089657 | -0.175219 | -0.442344 |
| C | -0.918901 | 0.066981  | 0.481410  | H | -2.583130 | -1.125399 | -0.204937 |
| H | 0.366844  | 1.880641  | 0.869138  | H | -2.819810 | 0.636199  | -0.320583 |
| H | -1.208848 | 0.078370  | 1.536734  | H | -1.756890 | -0.195427 | -1.487835 |
| O | 0.156691  | -0.974623 | 0.306283  | H | -0.103152 | 1.674530  | -0.852577 |

Free Energy: -306.328048 hartrees

### Compound L-lactide

Cartesian Coordinates

|   |          |           |           |   |          |           |           |
|---|----------|-----------|-----------|---|----------|-----------|-----------|
| C | 2.303424 | -0.901691 | -1.453030 | H | 2.887537 | -2.534918 | -4.461146 |
| C | 2.674411 | -2.068754 | -2.368437 | H | 1.699756 | -1.249594 | -4.105396 |
| C | 4.690590 | -0.609171 | -1.015688 | C | 4.955333 | -2.038193 | -1.490652 |
| H | 1.911827 | -2.835258 | -2.206406 | O | 3.928464 | -2.738832 | -2.021731 |
| H | 5.179102 | -0.518445 | -0.041768 | O | 6.049696 | -2.541716 | -1.382846 |
| O | 3.285448 | -0.311483 | -0.735549 | C | 5.271126 | 0.427546  | -1.980455 |
| O | 1.159845 | -0.519953 | -1.356091 | H | 5.116268 | 1.429682  | -1.566982 |
| C | 2.682791 | -1.655165 | -3.842000 | H | 6.345511 | 0.246898  | -2.095616 |
| H | 3.445650 | -0.894517 | -4.039678 | H | 4.793519 | 0.369966  | -2.964429 |

Free Energy: -534.114769 hartrees

### Compound 6<sub>L</sub>

Cartesian Coordinates

|    |         |         |         |
|----|---------|---------|---------|
| Zn | 1.0261  | 0.2229  | 0.6232  |
| S  | 2.1963  | -1.9380 | 1.0070  |
| N  | 2.6812  | 0.8928  | -0.1460 |
| C  | 3.7439  | -1.2415 | 0.3893  |
| C  | 3.7967  | 0.1102  | -0.1206 |
| C  | 4.8743  | -2.0651 | 0.4473  |
| H  | 4.7712  | -3.0681 | 0.8585  |
| C  | 5.0914  | 0.5140  | -0.5784 |
| H  | 5.2234  | 1.5109  | -0.9753 |
| C  | 1.5561  | -2.8265 | -0.5028 |
| H  | 2.2782  | -3.6214 | -0.7234 |
| H  | 0.6050  | -3.2727 | -0.1934 |
| C  | 6.1148  | -1.6254 | -0.0150 |
| H  | 6.9861  | -2.2736 | 0.0310  |
| C  | 6.2000  | -0.3231 | -0.5278 |
| S  | 0.0181  | -0.6926 | -1.5825 |
| N  | -1.5689 | -1.9531 | 0.8662  |
| C  | -1.4215 | -1.7898 | -1.5687 |
| C  | -2.0026 | -2.3356 | -0.3796 |
| C  | -1.9236 | -2.1212 | -2.8352 |
| H  | -1.4841 | -1.6484 | -3.7106 |
| C  | -3.0220 | -3.3045 | -0.5742 |
| H  | -3.4776 | -3.7718 | 0.2879  |
| C  | 1.3862  | -1.9384 | -1.7282 |
| H  | 1.1599  | -2.5550 | -2.6053 |
| H  | 2.2924  | -1.3534 | -1.9212 |
| C  | -2.9570 | -3.0444 | -2.9888 |
| H  | -3.3339 | -3.2896 | -3.9783 |
| C  | -3.4853 | -3.6460 | -1.8405 |
| C  | -2.0482 | -2.4534 | 2.1644  |
| C  | -1.6889 | -3.9285 | 2.4007  |
| C  | -3.5270 | -2.1371 | 2.4682  |
| H  | -1.4560 | -1.8684 | 2.8794  |
| H  | -0.6124 | -4.0819 | 2.2564  |
| H  | -1.9457 | -4.2044 | 3.4314  |
| H  | -2.2261 | -4.6046 | 1.7271  |
| H  | -3.7334 | -1.0803 | 2.2655  |
| H  | -4.2225 | -2.7446 | 1.8804  |
| H  | -3.7264 | -2.3297 | 3.5307  |
| C  | 2.6499  | 2.2519  | -0.7271 |
| C  | 2.9320  | 2.2937  | -2.2422 |

|   |         |         |         |
|---|---------|---------|---------|
| C | 3.4503  | 3.2981  | 0.0740  |
| H | 1.6017  | 2.5630  | -0.6320 |
| H | 2.2742  | 1.5837  | -2.7589 |
| H | 2.7187  | 3.3014  | -2.6234 |
| H | 3.9681  | 2.0484  | -2.4950 |
| H | 3.1464  | 3.2667  | 1.1283  |
| H | 4.5322  | 3.1393  | 0.0273  |
| H | 3.2370  | 4.3016  | -0.3188 |
| H | -4.2830 | -4.3818 | -1.9265 |
| H | 7.1543  | 0.0553  | -0.8926 |
| O | -0.5962 | 0.6704  | 1.4733  |
| H | -1.2250 | -0.9930 | 0.9623  |
| C | -0.6814 | 1.3852  | 2.7064  |
| C | 0.3985  | 0.9446  | 3.7025  |
| C | -2.0807 | 1.1931  | 3.2992  |
| H | -0.5386 | 2.4647  | 2.5050  |
| H | 1.4056  | 1.1360  | 3.3047  |
| H | 0.3004  | 1.4897  | 4.6516  |
| H | 0.2999  | -0.1314 | 3.9043  |
| H | -2.8520 | 1.4624  | 2.5692  |
| H | -2.2229 | 0.1443  | 3.5892  |
| H | -2.2091 | 1.8235  | 4.1891  |
| O | -2.6196 | 1.4438  | -3.0478 |
| C | -2.4262 | 1.8570  | -1.9287 |
| C | -3.0544 | 1.2880  | -0.6523 |
| C | -1.3210 | 3.2918  | -0.3240 |
| C | -2.6368 | 3.3956  | 0.4548  |
| O | -1.5900 | 2.9087  | -1.7186 |
| O | -3.5225 | 2.4002  | 0.1954  |
| O | -2.9036 | 4.2641  | 1.2528  |
| H | -0.7535 | 2.4745  | 0.1464  |
| H | -2.2623 | 0.7773  | -0.0846 |
| C | -4.2303 | 0.3695  | -0.9071 |
| H | -3.8934 | -0.4780 | -1.5109 |
| H | -4.6148 | -0.0038 | 0.0475  |
| H | -5.0243 | 0.8989  | -1.4447 |
| C | -0.5246 | 4.5807  | -0.3491 |
| H | -0.2689 | 4.8647  | 0.6767  |
| H | 0.3975  | 4.4311  | -0.9202 |
| H | -1.1093 | 5.3880  | -0.8029 |

Free Energy: -2639.078851 hartrees



**Transition State TS<sub>6-7L</sub>**Imaginary frequency at -65.4 cm<sup>-1</sup>

Cartesian Coordinates

|    |         |         |         |   |         |         |
|----|---------|---------|---------|---|---------|---------|
| Zn | -0.5525 | -0.2657 | -0.2365 |   |         |         |
| S  | -1.9624 | 0.5235  | 1.6787  | C | -1.7472 | -3.7198 |
| N  | -2.0769 | -1.4239 | -0.7144 | H | -1.0130 | -1.8483 |
| C  | -3.2357 | -0.6973 | 1.3033  | H | -3.4700 | -0.9277 |
| C  | -3.1467 | -1.5157 | 0.1136  | H | -2.6123 | -1.9883 |
| C  | -4.3037 | -0.7930 | 2.2032  | H | -3.8753 | -2.6560 |
| H  | -4.3008 | -0.1598 | 3.0893  | H | -1.7624 | -4.2709 |
| C  | -4.2686 | -2.3881 | -0.0801 | H | -0.7791 | -3.8996 |
| H  | -4.2945 | -3.0217 | -0.9556 | H | -2.5270 | -4.1329 |
| C  | -2.6701 | 2.0438  | 0.8677  | H | 0.7170  | 6.8736  |
| H  | -3.6351 | 2.2312  | 1.3522  | H | -6.1425 | -3.1511 |
| H  | -1.9808 | 2.8609  | 1.1120  | O | 1.1962  | -0.9109 |
| C  | -5.3630 | -1.6721 | 1.9779  | H | 1.3161  | 1.5455  |
| H  | -6.1893 | -1.7380 | 2.6812  | C | 1.2551  | -1.7728 |
| C  | -5.3268 | -2.4600 | 0.8171  | C | 0.0627  | -2.7301 |
| S  | -1.2915 | 1.8123  | -1.6048 | C | 1.3056  | -0.8760 |
| N  | 1.3625  | 2.3364  | -0.0089 | H | 2.1764  | -2.3585 |
| C  | -0.5343 | 3.3883  | -1.1360 | H | 0.0004  | -3.3084 |
| C  | 0.6589  | 3.4630  | -0.3557 | H | 0.1634  | -3.4303 |
| C  | -1.2081 | 4.5516  | -1.5347 | H | -0.8780 | -2.1779 |
| H  | -2.0946 | 4.4591  | -2.1595 | H | 2.1993  | -0.2421 |
| C  | 1.0645  | 4.7612  | 0.0522  | H | 0.4195  | -0.2326 |
| H  | 1.9685  | 4.8670  | 0.6379  | H | 1.3306  | -1.4967 |
| C  | -2.8726 | 1.9234  | -0.6369 | C | 1.9310  | -1.1413 |
| H  | -3.4234 | 2.7959  | -1.0044 | C | 2.1235  | -2.6442 |
| H  | -3.4269 | 1.0138  | -0.8919 | C | 4.2555  | -1.0542 |
| C  | -0.7838 | 5.8134  | -1.1199 | H | 1.1931  | -3.1640 |
| H  | -1.3243 | 6.7046  | -1.4292 | H | 4.3053  | -0.5784 |
| C  | 0.3577  | 5.9020  | -0.3120 | O | 3.1552  | -0.4658 |
| C  | 2.3921  | 2.2052  | 1.0323  | O | 1.0994  | -0.5499 |
| C  | 1.9251  | 2.7213  | 2.4019  | C | 2.5278  | -2.8901 |
| C  | 3.7708  | 2.7624  | 0.6267  | H | 3.5003  | -2.4293 |
| H  | 2.5029  | 1.1231  | 1.1251  | H | 2.5915  | -3.9679 |
| H  | 0.9164  | 2.3522  | 2.6220  | H | 1.7786  | -2.4461 |
| H  | 2.6070  | 2.3457  | 3.1751  | C | 4.1705  | -2.5592 |
| H  | 1.9176  | 3.8146  | 2.4628  | O | 3.1142  | -3.2705 |
| H  | 4.0336  | 2.4164  | -0.3797 | O | 5.0114  | -3.1059 |
| H  | 3.8054  | 3.8584  | 0.6411  | C | 5.5368  | -0.7262 |
| H  | 4.5307  | 2.3945  | 1.3297  | H | 5.6434  | 0.3616  |
| C  | -1.9495 | -2.2072 | -1.9594 | H | 6.4036  | -1.1423 |
| C  | -3.0524 | -1.9329 | -3.0140 | H | 5.4866  | -1.1453 |

Free Energy -2639.047489 hartrees

**Compound 7<sub>L</sub>**

# Cartesian Coordinates

Zn -0.5091 -0.2833 -0.3578  
S -1.8485 0.2205 1.6561  
N -1.7853 -1.7403 -0.7219  
C -2.8791 -1.2387 1.3945  
C -2.7299 -2.0445 0.2014  
C -3.8093 -1.5415 2.3957  
H -3.8567 -0.9047 3.2779  
C -3.6487 -3.1418 0.1205  
H -3.6224 -3.7872 -0.7468  
C -2.9119 1.5615 0.9213  
H -3.8518 1.5511 1.4847  
H -2.3836 2.5008 1.1219  
C -4.6725 -2.6305 2.2743  
H -5.3939 -2.8571 3.0552  
C -4.5772 -3.4179 1.1166  
S -1.7100 1.6128 -1.6509  
N 0.7837 2.5288 0.0254  
C -1.2241 3.2815 -1.1453  
C -0.0911 3.5360 -0.3131  
C -2.0824 4.3199 -1.5333  
H -2.9178 4.0929 -2.1932  
C 0.0508 4.8649 0.1644  
H 0.8869 5.1064 0.8071  
C -3.2068 1.4014 -0.5648  
H -3.9448 2.1499 -0.8733  
H -3.5862 0.3993 -0.7916  
C -1.9059 5.6202 -1.0610  
H -2.5853 6.4129 -1.3642  
C -0.8357 5.8754 -0.1945  
C 1.8219 2.5602 1.0690  
C 1.2485 2.8758 2.4576  
C 3.0506 3.4175 0.7108  
H 2.1628 1.5228 1.0989  
H 0.4179 2.1964 2.6838  
H 2.0329 2.7278 3.2105  
H 0.8873 3.9061 2.5452  
H 3.4247 3.1328 -0.2794  
H 2.8364 4.4920 0.7070  
H 3.8456 3.2354 1.4468  
C -1.6052 -2.4757 -1.9882  
C -2.8014 -2.3443 -2.9521

C -1.1273 -3.9337 -1.8258  
H -0.7725 -1.9566 -2.4819  
H -3.0380 -1.2835 -3.1047  
H -2.5415 -2.7841 -3.9246  
H -3.7019 -2.8456 -2.5820  
H -0.8517 -4.3368 -2.8097  
H -0.2401 -3.9671 -1.1819  
H -1.8837 -4.5928 -1.3888  
H -0.6742 6.8796 0.1938  
H -5.2400 -4.2731 0.9873  
O 1.4397 -0.8152 0.6949  
H 0.9542 1.8124 -0.6757  
C 1.6890 -1.8137 1.7355  
C 0.5724 -2.8558 1.7467  
C 1.7787 -1.0560 3.0578  
H 2.6394 -2.3125 1.5346  
H 0.5078 -3.3831 0.7901  
H 0.7654 -3.5923 2.5376  
H -0.3984 -2.3841 1.9419  
H 2.5900 -0.3185 3.0317  
H 0.8356 -0.5313 3.2543  
H 1.9677 -1.7585 3.8795  
C 2.0794 -0.7421 -0.6743  
C 2.4912 -2.1385 -1.2023  
  
C 4.2939 -0.3907 0.2300  
H 1.7151 -2.8599 -0.9335  
H 3.9804 -0.3030 1.2842  
O 3.2377 0.0876 -0.6110  
O 1.1605 -0.1479 -1.4232  
C 2.7215 -2.1308 -2.7072  
H 3.4755 -1.3796 -2.9695  
H 3.0656 -3.1209 -3.0273  
H 1.7858 -1.8861 -3.2183  
C 4.6265 -1.8785 0.0377  
O 3.7134 -2.6740 -0.5663  
O 5.6402 -2.3749 0.4833  
C 5.5134 0.4950 -0.0092  
H 5.2494 1.5344 0.2097  
H 6.3326 0.1792 0.6434  
H 5.8363 0.4186 -1.0540

Free Energy -2639.053252 hartrees

## Transition State TS<sub>7-8L</sub>

Imaginary frequency at -41.3 cm<sup>-1</sup>

# Cartesian Coordinates

Zn -0.7972 -0.9206 0.2206

S -1.6312 0.5579 2.0432

|   |         |         |         |   |         |         |         |
|---|---------|---------|---------|---|---------|---------|---------|
| N | -2.6224 | -0.9775 | -0.4487 | H | -1.8460 | -1.7826 | -2.1612 |
| C | -3.3329 | 0.1464  | 1.6003  | H | -4.5877 | -0.4872 | -2.5411 |
| C | -3.6262 | -0.5512 | 0.3690  | H | -3.0039 | 0.2517  | -2.8526 |
| C | -4.3349 | 0.5700  | 2.4798  | H | -3.5206 | -1.1822 | -3.7762 |
| H | -4.0457 | 1.0768  | 3.3993  | H | -3.4466 | -3.5032 | -2.6589 |
| C | -5.0235 | -0.7278 | 0.1147  | H | -2.9174 | -3.6388 | -0.9631 |
| H | -5.3362 | -1.2324 | -0.7888 | H | -4.5296 | -3.0051 | -1.3445 |
| C | -1.5462 | 2.3273  | 1.4423  | H | 2.8968  | 6.3197  | -0.8047 |
| H | -2.1758 | 2.8962  | 2.1370  | H | -7.0510 | -0.4645 | 0.7356  |
| H | -0.5040 | 2.6406  | 1.5715  | O | 2.5820  | -1.7083 | 0.9845  |
| C | -5.6843 | 0.3637  | 2.1920  | H | 1.1846  | 1.2427  | 0.0063  |
| H | -6.4563 | 0.6955  | 2.8815  | C | 3.2219  | -2.4365 | 2.0782  |
| C | -6.0072 | -0.2881 | 0.9933  | C | 3.4254  | -1.4593 | 3.2329  |
| S | -0.8387 | 2.0587  | -1.3071 | C | 4.5345  | -3.0289 | 1.5703  |
| N | 1.9051  | 1.9410  | 0.1201  | H | 2.5455  | -3.2374 | 2.4068  |
| C | 0.3870  | 3.3755  | -1.1342 | H | 2.4638  | -1.0467 | 3.5589  |
| C | 1.6085  | 3.1670  | -0.4201 | H | 3.8991  | -1.9732 | 4.0796  |
| C | 0.1100  | 4.6137  | -1.7276 | H | 4.0786  | -0.6356 | 2.9179  |
| H | -0.8217 | 4.7297  | -2.2786 | H | 4.3590  | -3.7089 | 0.7291  |
| C | 2.4912  | 4.2730  | -0.3239 | H | 5.2003  | -2.2243 | 1.2321  |
| H | 3.4279  | 4.1587  | 0.2069  | H | 5.0343  | -3.5819 | 2.3767  |
| C | -2.0341 | 2.5532  | 0.0165  | C | 1.3663  | -2.2701 | 0.5198  |
| H | -2.2416 | 3.6201  | -0.1251 | C | 1.6057  | -3.5065 | -0.3534 |
| H | -2.9541 | 1.9910  | -0.1774 | C | 1.6703  | -0.9669 | -1.7759 |
| C | 0.9937  | 5.6889  | -1.6147 | H | 2.0836  | -4.2452 | 0.2985  |
| H | 0.7609  | 6.6449  | -2.0772 | H | 2.2234  | -0.0275 | -1.6610 |
| C | 2.1860  | 5.5009  | -0.9042 | O | 0.8918  | -1.1694 | -0.5679 |
| C | 2.9264  | 1.6078  | 1.1259  | O | 0.3659  | -2.3221 | 1.3454  |
| C | 2.8265  | 2.4594  | 2.4028  | C | 0.3470  | -4.0917 | -0.9746 |
| C | 4.3510  | 1.5667  | 0.5471  | H | -0.1578 | -3.3520 | -1.6044 |
| H | 2.6794  | 0.5799  | 1.3995  | H | 0.6009  | -4.9673 | -1.5823 |
| H | 1.8134  | 2.4005  | 2.8207  | H | -0.3383 | -4.3913 | -0.1756 |
| H | 3.5310  | 2.0745  | 3.1511  | C | 2.7207  | -2.0648 | -2.0101 |
| H | 3.0648  | 3.5133  | 2.2219  | O | 2.6240  | -3.2589 | -1.3878 |
| H | 4.3776  | 0.9255  | -0.3420 | O | 3.6150  | -1.8746 | -2.8072 |
| H | 4.7269  | 2.5584  | 0.2719  | C | 0.7379  | -0.8940 | -2.9875 |
| H | 5.0330  | 1.1449  | 1.2972  | H | -0.0144 | -0.1172 | -2.8247 |
| C | -2.8540 | -1.6183 | -1.7588 | H | 1.3242  | -0.6438 | -3.8779 |
| C | -3.5434 | -0.7017 | -2.7887 | H | 0.2350  | -1.8539 | -3.1510 |
| C | -3.4853 | -3.0228 | -1.6716 |   |         |         |         |

Free Energy: -2639.044907 hartrees

### Compound 8<sub>L</sub>

Cartesian Coordinates

|    |        |         |         |   |        |         |         |
|----|--------|---------|---------|---|--------|---------|---------|
| Zn | 1.1371 | -0.7053 | -0.3308 | C | 3.9486 | -1.1149 | 0.0261  |
| S  | 2.6385 | 0.7451  | -1.6634 | C | 5.3379 | 0.3293  | -1.4564 |
| N  | 2.7164 | -1.5058 | 0.4596  | H | 5.3752 | 1.1022  | -2.2227 |
| C  | 4.0900 | -0.0807 | -0.9738 | C | 5.1901 | -1.6525 | 0.4931  |

|   |         |         |         |   |         |         |         |
|---|---------|---------|---------|---|---------|---------|---------|
| H | 5.1801  | -2.4273 | 1.2469  | H | 2.6916  | -2.8091 | 3.6603  |
| C | 2.5548  | 2.2759  | -0.5977 | H | 2.5612  | -4.6560 | 1.8746  |
| H | 3.4474  | 2.8656  | -0.8371 | H | 2.4806  | -4.2069 | 0.1521  |
| H | 1.6620  | 2.8159  | -0.9315 | H | 4.0098  | -4.0649 | 1.0383  |
| C | 6.5209  | -0.2277 | -0.9700 | H | -2.1469 | 6.0079  | 0.9645  |
| H | 7.4856  | 0.0987  | -1.3500 | H | 7.3251  | -1.6817 | 0.4134  |
| C | 6.4219  | -1.2231 | 0.0123  | O | -4.0057 | -1.7898 | -0.1672 |
| S | 0.9180  | 1.2522  | 1.4871  | H | -0.8899 | 0.9885  | -0.6683 |
| N | -1.0541 | 1.9691  | -0.9012 | C | -4.0385 | -1.2250 | 1.2073  |
| C | -0.1819 | 2.6760  | 1.2702  | C | -4.5626 | 0.1938  | 1.0629  |
| C | -0.9718 | 2.8997  | 0.0964  | C | -2.6253 | -1.2843 | 1.7768  |
| C | -0.1717 | 3.6058  | 2.3198  | H | -4.7244 | -1.8442 | 1.7959  |
| H | 0.4190  | 3.3843  | 3.2070  | H | -5.5473 | 0.2016  | 0.5809  |
| C | -1.6470 | 4.1496  | 0.0296  | H | -4.6538 | 0.6415  | 2.0602  |
| H | -2.2418 | 4.3777  | -0.8446 | H | -3.8680 | 0.8015  | 0.4747  |
| C | 2.5130  | 1.9945  | 0.8989  | H | -2.3098 | -2.3196 | 1.9426  |
| H | 2.6523  | 2.9295  | 1.4529  | H | -1.9338 | -0.8054 | 1.0747  |
| H | 3.2971  | 1.2857  | 1.1883  | H | -2.5902 | -0.7452 | 2.7307  |
| C | -0.8727 | 4.8089  | 2.2363  | C | -3.8915 | -3.1185 | -0.2903 |
| H | -0.8475 | 5.5206  | 3.0577  | C | -3.6212 | -3.5761 | -1.7360 |
| C | -1.5974 | 5.0735  | 1.0671  | C | -1.1262 | -2.0459 | -1.6101 |
| C | -1.6816 | 2.1095  | -2.2268 | H | -2.7440 | -4.2323 | -1.6804 |
| C | -1.0288 | 3.2145  | -3.0724 | H | -1.5575 | -2.5451 | -0.7290 |
| C | -3.2192 | 2.2061  | -2.1989 | O | -0.4958 | -0.8594 | -1.2353 |
| H | -1.4513 | 1.1517  | -2.7037 | O | -3.9737 | -3.9307 | 0.6124  |
| H | 0.0561  | 3.0588  | -3.1269 | C | -4.8153 | -4.3611 | -2.2804 |
| H | -1.4361 | 3.1772  | -4.0907 | H | -5.6920 | -3.7077 | -2.3589 |
| H | -1.2129 | 4.2179  | -2.6721 | H | -4.5720 | -4.7561 | -3.2724 |
| H | -3.6363 | 1.3681  | -1.6312 | H | -5.0417 | -5.1921 | -1.6043 |
| H | -3.5835 | 3.1422  | -1.7610 | C | -2.2521 | -1.7085 | -2.6207 |
| H | -3.5983 | 2.1409  | -3.2269 | O | -3.3724 | -2.5022 | -2.6734 |
| C | 2.5013  | -2.5160 | 1.5181  | O | -2.1745 | -0.8081 | -3.4236 |
| C | 3.0271  | -2.0878 | 2.9030  | C | -0.1753 | -3.0485 | -2.3002 |
| C | 2.9252  | -3.9448 | 1.1207  | H | 0.6115  | -3.3412 | -1.5930 |
| H | 1.4085  | -2.5629 | 1.6319  | H | -0.7019 | -3.9571 | -2.6237 |
| H | 4.1193  | -2.0326 | 2.9479  | H | 0.2842  | -2.5729 | -3.1749 |
| H | 2.6234  | -1.1004 | 3.1606  |   |         |         |         |

Free Energy: -2639.071907 hartre
